1 **TITLE**

2 Endospores and other lysis-resistant bacteria comprise a widely shared core community  
3 within the human microbiota

4

5 **AUTHORS**

6 Sean M. Kearney<sup>1,2,3</sup>, Sean M. Gibbons<sup>1,2,3</sup>, Mathilde Poyet<sup>1,2,3</sup>, Thomas Gurry<sup>1,2,3</sup>,  
7 Kevin Bullock<sup>2</sup>, Jessica R. Allegretti<sup>4,5</sup>, Clary B. Clish<sup>2</sup>, Eric J. Alm<sup>1,2,3,\*</sup>

8 <sup>1</sup> Department of Biological Engineering, Massachusetts Institute of Technology,  
9 Cambridge, MA, U.S.A.

10 <sup>2</sup> The Broad Institute, Cambridge, MA, U.S.A.

11 <sup>3</sup> The Center for Microbiome Informatics and Therapeutics, Cambridge, MA, U.S.A.

12 <sup>4</sup> Division of Gastroenterology, Brigham and Women's Hospital, Boston, MA, USA

13 <sup>5</sup> Harvard Medical School, Boston, MA, USA

14 \* Corresponding author: [ejalm@mit.edu](mailto:ejalm@mit.edu)

15

16 **ABSTRACT**

17

18 Endospore-formers in the human microbiota are well adapted for host-to-host  
19 transmission, and an emerging consensus points to their role in determining health and  
20 disease states in the gut. The human gut, more than any other environment,  
21 encourages the maintenance of endospore formation, with nearly 60% of genera in the  
22 microbiome carrying genes attributed to this trait. However, there has been limited work  
23 on the ecological role of endospores and other stress-resistant cellular states in the  
24 human gut. Here, we applied a culture-independent protocol to enrich for endospores  
25 and other stress-resistant cells in human feces, and provide evidence that organisms  
26 found in resistant states are adapted for cross-host dissemination. Furthermore,  
27 organisms with resistant cellular states respond to shared environmental signals that  
28 likely mediate colonization of recently disturbed human guts.

29

30 **INTRODUCTION**

31

32 To date, there is limited work investigating the relevance of stress-resistant cellular  
33 states in the propagation, survival, and function of organisms in the mammalian  
34 gastrointestinal (GI) tract. The gut is the only known environment with such a  
35 considerable abundance of organisms that form endospores, considered the most  
36 stress-resistant of all cell-types<sup>1</sup>. Anaerobic, endospore-forming Firmicutes are  
37 numerically dominant members of the GI tract of most animal species<sup>2,3</sup>. Within this  
38 group of organisms, the presence of genes for endospore formation suggests that

39 growth in the GI tract favors the maintenance of this large gene repertoire<sup>2</sup>. The  
40 apparent utility of these genes is to allow organisms to enter metabolically dormant  
41 states that aid in survival and transmission to new hosts. Passage through the GI tract  
42 is likely to trigger sporulation<sup>4,5</sup>, but the mechanisms by which this process occurs and  
43 the signals that induce sporulation here are mostly unknown, even for well-studied  
44 pathogens like *Clostridioides difficile*. Resistant cellular states like endospores appear to  
45 be adaptive in the mammalian gut environment. It is likely that other non-endospore-  
46 forming taxa have evolved analogous resistance strategies for passing between hosts.

47  
48 Many endospore-forming organisms in the human gut are in the class Clostridia, the  
49 most well-studied of which are the pathogens *C. difficile* and *Clostridium perfringens*<sup>6,7</sup>.  
50 However, Clostridia also includes abundant organisms not known to form endospores,  
51 like *Faecalibacterium prausnitzii*<sup>8</sup> and *Roseburia intestinalis*<sup>9</sup>. For *C. difficile*, the role of  
52 sporulation is central to disease etiology<sup>10</sup>, particularly in patients who experience  
53 recurrence. Sporulation and rising levels of antibiotic resistance allow *C. difficile* to  
54 persist in the face of antibiotic assault, ensuring that it remains in the environment to  
55 rapidly re-colonize its host.

56  
57 Among Clostridia that do not cause disease, multiple strains of endospore-forming  
58 organisms have the capacity to induce T regulatory cells and associated anti-  
59 inflammatory cytokines<sup>11,12</sup> involved in sensitivity to, for example, peanut antigen<sup>13</sup>.  
60 These organisms have recently been shown to provide pathogen resistance in neonatal  
61 mice<sup>14</sup>. Similarly, endospore-forming commensals of the murine GI tract have a central

62 role in mediating the induction of a Th17-type T helper cell response<sup>15-17</sup>. Many  
63 Clostridia also produce butyrate as an end-product of metabolism, which can regulate  
64 how immune cells interact with gut commensal bacteria<sup>18-22</sup>. This group of organisms  
65 also boosts production of serotonin by enterochromaffin cells in the intestine, crucial for  
66 motility in the gut<sup>23</sup>. An ecological understanding of sporulation and induction of other  
67 resistant states could be informative for how these phenotypes interact with host  
68 immunity. For example, such an understanding could inform whether inflammation acts  
69 positively or negatively on endospore formation, or whether endospores themselves  
70 have immunomodulatory effects.

71  
72 Environmental stress resistance protects cells faced with unfavorable conditions. The  
73 signals triggering resistance are likely quite varied. Even for well-studied endospore-  
74 forming bacteria, inducing sporulation *in vitro* can be difficult, and across strains of one  
75 species, signals that induce sporulation in one strain may be insufficient to induce  
76 sporulation in others<sup>24</sup>. Further, even organisms that abundantly form endospores in  
77 their native environment may not do so under conditions permitting vegetative growth.  
78 For instance, *Paenibacillus larvae* in honeybees will only form endospores *in vitro* under  
79 idiosyncratic conditions designed to mimic the host environment<sup>25</sup>. Similarly, certain  
80 strains of *Clostridium perfringens* rarely form endospores *in vitro* unless exposed to a  
81 specific set of environmental stressors<sup>24</sup>. The discrepancy in phenotype of organisms in  
82 their native environments compared to *in vitro* argues for culture-free approaches to  
83 investigate such phenotypes *in situ*. Enriching for stress-resistant cells in environmental  
84 samples provides a means to uncover the actual context in which these states form.

85

86 Here, we investigate which organisms are present as endospores or as other resistant  
87 cell types in the human gastrointestinal tract. We modified previously described  
88 methods to enrich fecal samples for endospores and obtain paired bulk community and  
89 resistant fraction 16S rDNA sequence data for 24 healthy individuals and one individual  
90 across 24 days. We consistently enriched for putatively endospore-forming taxa in all  
91 samples, as well as other taxa, predominantly from the Actinobacteria phylum, that  
92 show high levels of lysis resistance. We compared resistant OTUs (rOTUs) and non-  
93 resistant OTUs (nOTUs) to identify ecological characteristics differing between these  
94 groups. Using a database of rOTUs, we find consistent signals for these organisms in  
95 their responses to a variety of disturbances across multiple independent data sets.  
96 Overall, we show a tight association between the ecological role of these resistant  
97 organisms and their distribution within and across human hosts.

98

## 99 **RESULTS AND DISCUSSION**

100

101 *Sequencing resistant fraction reveals resistant taxa present in human feces*

102

103 We modified a culture-independent method<sup>26</sup> to generate paired bulk community and  
104 resistant fraction 16S rDNA amplicon data from human feces (Figure 1A). Aggregating  
105 the data across our cohort, we see expansion of classes with known endospore-formers  
106 in the resistant fraction: Clostridia, Erysipelotrichia, and Bacilli (Figure 1B). We also see

107 depletion of classes lacking endospore-formers (Bacteroides, Betaproteobacteria,  
108 Verrucomicrobia, Gammaproteobacteria).

109

110 Organisms in the class Actinobacteria were enriched in the resistant fraction, but lack  
111 genes considered essential for endospore formation. Although exospore formation is  
112 well documented in some families of Actinobacteria (e.g. Actinomycetaceae and  
113 Streptomycetaceae), these families have only modest representation in our data. We  
114 see high-level resistance primarily from *Bifidobacterium* and *Collinsella*, whose  
115 representative genomes lack orthologs for genes thought to be essential to exospore  
116 formation.

117

118 We suspect that high level resistance in the Actinobacteria is mediated primarily by  
119 resistance to lysozyme conferred by cell wall structures common to Actinobacteria<sup>27</sup>.  
120 Lysozyme is one of the most common and important defense mechanisms used by  
121 neutrophils, monocytes, macrophages, and epithelial cells<sup>28,29</sup>. It is abundant in human  
122 milk, a source of *Bifidobacterium* species transferred to breast-feeding infants, and in  
123 saliva and mucus, where it serves an antibacterial role<sup>30</sup>. Attempts to deplete  
124 Actinobacteria with achromopeptidase, which has previously been shown to break down  
125 Actinobacterial peptidoglycan, had variable efficacy across samples (data not shown).  
126 Thus, factors other than cell wall structure may contribute to Actinobacteria resistance.

127

128 To quantify the extent of lysis resistance, we calculated the proportion of normalized  
129 reads for each 100% OTU (unique sequence) in the resistant fraction to the sum of its

130 reads in the bulk community and the resistant fraction. We then obtain a finite quantity  
131 even for organisms not observed in one of the paired samples. When the proportion  
132 exceeds 0.5 we call an OTU enriched in the resistant fraction (Figure 1A). An OTU is  
133 enriched in at least one of the samples in which it is present is considered a resistant  
134 OTU (rOTU), and non-resistant (nOTU) otherwise. Using the above definitions, all of the  
135 rOTUs are either Firmicutes or Actinobacteria (Figure 1C). In fact, when grouping OTUs  
136 at the genus level, the top two most enriched genera (*Bifidobacterium*, *Collinsella*) are  
137 both Actinobacteria.

138

139 *Resistant fractions consist of a few dominant and many rare OTUs*

140

141 In order to investigate ecological properties of the resistant cell fraction, we first  
142 examined the community structure of resistant fractions and compared these to their  
143 bulk community counterparts. Using alpha diversity metrics, it is clear that resistant  
144 fractions are significantly less diverse than their bulk community counterparts (Figure  
145 2A). However, this difference is driven largely by differences in evenness between the  
146 communities, as enrichments are significantly less even. The OTU richness between  
147 resistant fractions and bulk community samples tend to be no different. Thus, in  
148 general, resistant fractions are dominated by a few highly abundant OTUs and many  
149 OTUs with just a single count.

150

151 *rOTUs are more shared than nOTUs among individuals*

152

153 Resistant fraction OTUs are shared between individuals more often than bulk  
154 community OTUs (Figure 2B). By comparing the ratio of OTUs found in a single person  
155 to OTUs found in multiple individuals, we find a significantly higher proportion of OTUs  
156 shared in the resistant fraction than in the bulk community (Fisher Exact Test, odds ratio  
157 = 1.68, p-value =  $1.5e-45$ , Figure 2B). Furthermore, the majority of OTUs found in the  
158 resistant fractions are not observed in their bulk community counterparts. We interpret  
159 these results to mean that the resistant fractions comprise a seed bank of generally rare  
160 OTUs that are widespread within our cohort.

161  
162 To further test the hypothesis that resistant states contribute to prevalence, we  
163 examined the frequency with which rOTUs were found among the bulk communities  
164 across individuals compared to nOTUs (Supplementary Figure 1). First, nOTUs, which  
165 are never enriched in the resistant fraction, are significantly less likely to be shared  
166 among multiple individuals than rOTUs (Mann Whitney U Test comparing the  
167 distribution of the number of individuals sharing each rOTU to the number of individuals  
168 sharing each nOTU, p-value =  $4.8e-8$ ). We again see this result by calculating the  
169 correlation between the frequency of resistance (the number of times an organism is  
170 enriched in the resistant fraction divided by the number of times it is observed) and  
171 sharedness (number of individuals an OTU is observed in divided by the total number of  
172 individuals), giving a weak, but positive and highly significant correlation (Spearman rho,  
173 correlation = 0.12, p-value =  $7.3e-25$ ; Kendall tau, correlation = 0.10, p-value =  $1.97e-$   
174 24). This result suggests that organisms that do not form resistant states are less likely  
175 to be found across multiple individuals than those that do. In fact, rOTUs tend to be less



176 dominant members of the community (median rOTUs = 1 count, median nOTUs = 2  
177 counts, Mann-Whitney U Test, p-value = 3.5e-13). This result indicates that organisms  
178 found in resistant states generally have lower overall abundance. We suggest that  
179 organisms with resistant states sacrifice abundance within an individual for higher rates  
180 of dispersal across individuals.

181

182 *Representation of organisms in resistant fractions is heterogeneous across and within*  
183 *individuals*

184

185 A tradeoff between resistance and population size within a host suggests that there may  
186 be strong positive selection for such resistance phenotypes. Variation in this trait among  
187 related organisms could be indicative of selection. In order to visualize how much of a  
188 population is present in a resistant state within a given sample, we scaled 16S rDNA  
189 abundance data using V4 16S rDNA qPCR-based estimates of community size and  
190 defined the resistant fraction as the ratio of these scaled reads for each OTU. We plot  
191 this quantity on a phylogeny representing 99% OTUs (clustered at 99% nucleotide  
192 identity) present in at least 8 individuals and up to 24 individuals (Figure 3). First, we  
193 note the high variability in the resistant fraction within and across taxa (the average  
194 variation is over 50-fold within each taxon). For one *Roseburia* 99% OTU in particular,  
195 this quantity varies over 3 orders of magnitude, suggesting this OTU contains  
196 organisms present in a resistant state in some individuals, but not in others.

197

198 Furthermore, within a person, OTUs with the same genus classification can be  
199 discordant in their degree of resistance. In the individual time series, for example, one  
200 *Ruminococcus* 100% OTU is almost always enriched, and another is never enriched  
201 (Supplementary Figure 4). The closest matching genomes to these two organisms show  
202 differences in sporulation gene content, with the resistant *Ruminococcus* sharing 48/58  
203 core sporulation genes<sup>31</sup>, and the non-resistant only 41/58 (Supplementary Figure 5 and  
204 Supplementary Table 5). We also see that spore maturation proteins *spmA* and *spmB*  
205 vary in their presence in genomes of genera with variable enrichment phenotypes.  
206 These genes are involved in spore cortex dehydration and heat resistance in *B. subtilis*  
207 and *C. perfringens*, so their loss might contribute to differences in the recovery of  
208 resistant cells in this work.

209  
210 Formation of resistant cells itself might be selected on in this system. There is evidence  
211 that the sporulation phenotype is evolving in mammalian guts, as several gut isolates of  
212 *B. subtilis* lack genes that negatively regulate sporulation compared to their laboratory  
213 counterparts<sup>34</sup>. Knowing which organisms can form resistant cells in a community does  
214 not provide complete information about which organisms do. Formation of resistant  
215 states *in vivo* seems to be highly context dependent. We also note that loss of a single  
216 gene (i.e. *spo0A*) in *C. difficile* is sufficient for loss of sporulation, such that retaining  
217 endospore formation requires strong purifying selection.

218  
219 *rOTUs share signals for growth within an individual*

220

221 Previous evidence has shown that bile acids contribute to outgrowth of *C. difficile*  
222 endospores *in vivo*<sup>35</sup>. As a first pass to measure bile acid concentration in the gut, we  
223 tracked a *Bilophila* OTU in the time series. *Bilophila* are known to use taurine derived  
224 from taurocholic acid, a primary bile acid, as an electron acceptor for sulfite reduction<sup>36</sup>.  
225 Among rOTUs within the bulk community time series, the average Spearman correlation  
226 to *Bilophila* is 0.110 compared to 0.015 for nOTUs (Mann Whitney U Test p-value =  
227 3.17e-14). The abundance distribution for *Bilophila* provides information about the  
228 abundance of rOTUs. As, taurocholate is a known germinant for several endospore-  
229 forming species<sup>2</sup>, *Bilophila* abundance might act as a proxy for taurocholate  
230 concentration or the capacity for sulfite reduction, which requires reducing anaerobic  
231 conditions.

232

233 More broadly, the consistent correlations between rOTUs and *Bilophila* implied that  
234 rOTUs would in general be more correlated to each other. By hierarchically clustering  
235 the Spearman correlation profiles of all OTUs present for at least half of the time series  
236 (Figure 4A), we find that the rOTUs mostly fall into one of two clusters, with nOTUs in  
237 the other cluster (Fisher exact test, p-value = 3.13e-25). The average correlation  
238 between rOTUs in the time series to each other is 0.156 compared to 0.014 for nOTUs  
239 to each other (Wilcox rank sum test, p-value = 0): nearly all of the strong correlated  
240 behavior in this person is within this group of organisms (Figure 4A). We interpret this  
241 result to mean that the dynamic behavior of rOTUs is strongly coupled: these OTUs  
242 respond coherently to environmental signals, which are likely linked to bile acids given  
243 their correlations to *Bilophila*.

244

245 *rOTUs link growth to fatty acid metabolism*

246

247 To address whether bile-related signals relate to the dynamics of rOTUs in the time  
248 series, we conducted untargeted metabolomics with standards for fatty acid  
249 metabolism. We then calculated the Spearman correlations between the median  
250 abundance profile of OTUs in the rOTU-dominated correlation cluster and metabolites  
251 for which we had standard markers. This cluster tends to correlate positively with long-  
252 chain saturated fatty acids, and negatively with long-chain polyunsaturated fatty acids  
253 and, notably, taurocholate (Supplementary Table 3). We suspect that taurocholate  
254 metabolism by members of this group drives down the concentration of taurocholate in  
255 stool. Additionally, saturated fatty acid concentration in the stool measures fatty acids  
256 escaping absorption in the small intestine. This process would be negatively impacted  
257 by microbial metabolism of taurocholate, as it more efficiently emulsifies saturated fats  
258 than glycine-conjugated primary bile acids<sup>36</sup>. Fecal concentrations of taurocholate  
259 reflect secretion of unmetabolized taurocholate, which should increase if taurocholate  
260 metabolism by the gut microbiota decreases.

261

262 *Resistant cells lose resistance in response to physiological bile acid concentrations*

263

264 As a more direct test of the coupling of rOTUs to bile acid concentration, we dosed  
265 ethanol-treated feces (to kill vegetative cells without the additional harshness of the  
266 resistant fraction DNA enrichment protocol) with increasing concentrations of bovine bile

267 in aqueous solution. We then measured the depletion of OTUs from the endospore-  
268 enrichment using 16S rDNA sequencing (Figure 4B). When correcting for biomass via  
269 qPCR, nearly 20% of OTUs identified in the resistant fraction apparently germinated in  
270 response to bile acids (log-link quasipoisson generalized linear model, p-value < 0.05,  
271 Supplementary Table 4). The true fraction of resistant cells that lose resistance in  
272 response to bile acids is likely higher, as many endospores require an activation step  
273 (i.e. heating at 80°C or treatment with lysozyme as for *C. difficile*<sup>37</sup>) before they will  
274 respond to germinants.

275

276 Notably, most ethanol-resistant OTUs began to show a germination-like response at  
277 0.5% bile (Figure 4B), which is near the concentrations found in the human small  
278 intestine<sup>38</sup>. Although Clostridia and other putative endospore-formers make up the  
279 majority of organisms that lose resistance in response to bile acids, genera in the  
280 Actinobacteria and other resistant cells also show this response when approaching  
281 physiological concentrations. These conserved responses suggest that the same cues  
282 can mediate loss of resistance in distantly related organisms, similar to the conserved  
283 resuscitation response of dormant bacteria to peptidoglycan<sup>39</sup>.

284

285 *rOTUs exhibit shared dynamics in diverse contexts*

286

287 Correlated behavior, increased prevalence, and shared signals for growth among  
288 rOTUs indicated that these organisms might exhibit a global response during  
289 disturbances of various kinds. To test this hypothesis, we made a sequence database of

290 rOTUs within our cohort, and used this database to identify putative rOTUs in other  
291 datasets (Figure 5A). We expected that increased prevalence and shared signals for  
292 growth would lead to enhanced colonization of the developing infant gut microbiota<sup>40</sup>.  
293 The lysozyme-resistant members of the Actinobacteria and Bacillales dominate the  
294 infant gut microbiota for most of the first 80 days of life and do not equilibrate until the  
295 infant starts a full adult diet (Figure 5B). Early colonization by these rOTUs connects a  
296 resistant state to development of the infant gut microbiome. Here, lysozyme resistance  
297 might be essential for semi-selective transmission of *Bifidobacterium*, as human breast  
298 milk is rich in lysozyme, potentially lysing non-resistant cells<sup>41</sup>. Others have shown  
299 endospore-formers negatively associate with vertical transmission from mother to  
300 infant<sup>42</sup>, but other environmentally resistant states as in the Actinobacteria may be  
301 important for vertical transmission.

302  
303 Depletion of endospore-forming clades is common during infection with *C. difficile*. We  
304 predicted a strong signal for rOTUs in individuals infected with *C. difficile*, due to its  
305 sporulation requirement for transmission<sup>10</sup>. We find a significant depletion of rOTUs  
306 dependent on *C. difficile* infection status (Figure 5C), with a serial depletion of rOTUs  
307 from healthy to first time diagnosis to recurrent patients<sup>43</sup>. Because of this depletion in  
308 rOTUs, we expected that fecal microbiota transplant (FMT) might transfer relatively  
309 more rOTUs than other OTUs<sup>44</sup>. Indeed, among OTUs shared with donors, 90% of  
310 rOTUs increase in abundance following FMT, compared to 77% for the rest of the  
311 community (Fisher exact test, p-value = 0.008) (Figure 5D).

312

313 We suspected that rOTUs are a particularly malleable component of the microbiota. To  
314 test this hypothesis, we measured the turnover of rOTUs in the time series of an  
315 otherwise healthy male individual who was infected by *Salmonella*<sup>47</sup>. New rOTUs almost  
316 completely replaced old rOTUs following this perturbation. By contrast, fewer OTUs  
317 from the rest of the community were lost and gained. This result holds both when  
318 examining the number of OTUs replaced (Fisher exact test, p-value = 6e-12) as well as  
319 the change in abundance of these OTUs (Figure 5E). We see again that rOTUs exhibit  
320 coherent responses to changes in the gut environment, most pronounced in systems  
321 with dramatic perturbations. Colonization of newly vacant niches favors rOTUs, likely  
322 transmitted in an endospore or other resistant state to germinate in an environment  
323 replete with nutrients (including untransformed bile acids). In the absence of a fully  
324 functioning microbiota, rOTUs appear to fill open niches more readily than nOTUs.

325

## 326 **CONCLUSION**

327

328 Gut bacteria in the resistant fraction were more shared across individuals and showed  
329 more correlated dynamics compared to non-resistant organisms. Resistant taxa show  
330 greater turnover following large-scale disturbance events, as in the case of *C. difficile*  
331 and *Salmonella* infection, which suggests that many of these organisms are sensitive to  
332 environmental fluctuations and respond to stress by entering into a dormant, seed-like  
333 state. Environmental sensitivity and high turnover rates of resistant taxa provide an  
334 opportunity to manipulate the composition of the human gut microbiota through targeted  
335 perturbations and replacements. Because of the therapeutic relevance of Clostridia

336 endospores<sup>11-14,23</sup>, determining the exact conditions that permit their replacement may  
337 be of high value for future microbiota-based therapeutics. Here, we found that the  
338 growth of many resistant organisms was associated with dietary fatty acids. If this result  
339 extends to more individuals, one can imagine a therapeutic strategy coupling dietary  
340 changes with introduced resistant cells to enable robust colonization and engraftment.



341 **MATERIALS AND METHODS**

342 See supplemental information for materials and methods

343

344 **DATA AVAILABILITY STATEMENT**

345 All amplicon sequencing data generated in this study have been can be accessed on  
346 the US National Center for Biotechnology Information SRA database under BioProject  
347 PRJNA389431. Metabolomics data and WGS metagenomic data will be made available  
348 on request.

349

350 **CODE AVAILABILITY STATEMENT**

351 All custom scripts generated in R to analyze the data in this paper will be made  
352 available through GitHub (<https://github.com/microbetrainer/Spores>). The sequence  
353 processing pipeline is currently available online ([http://amplicon-sequencing-  
354 pipeline.readthedocs.io/en/latest/](http://amplicon-sequencing-pipeline.readthedocs.io/en/latest/))

355

356 **Acknowledgments**

357 We thank Fatima Hussain and Mathieu Groussin for extensive discussion and  
358 experimental advice. We thank the MIT BioMicro Center for sequencing service.

359

360 Funding was provided by the Broad Institute BN10 Training Grants. SM Kearney was  
361 funded by an NSF Graduate Research Fellowship.

362

363

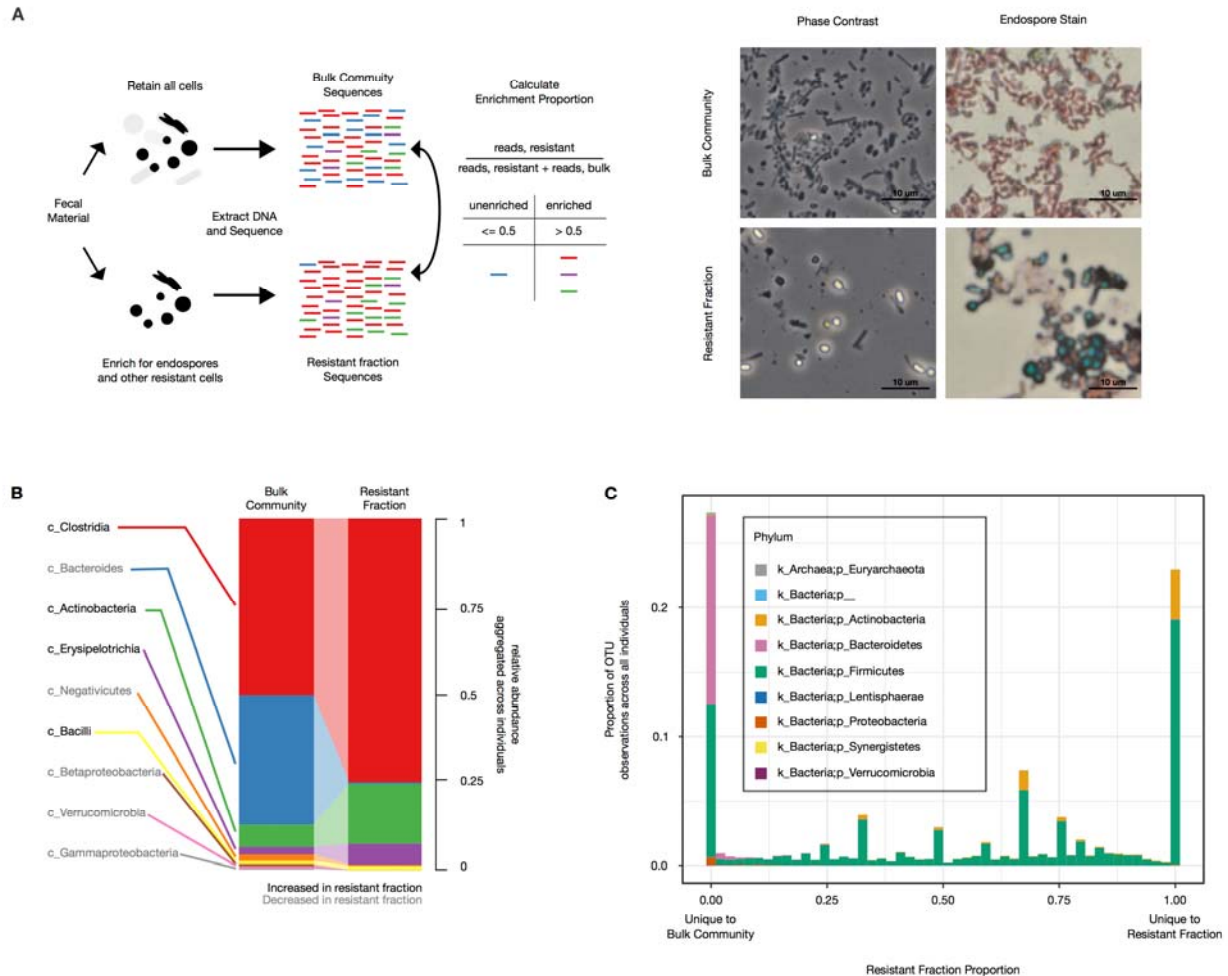

364

365 **Figure 1. Resistant fraction sequencing of human fecal bacteria.** (A) Overview of  
 366 resistant cell enrichment and 16S rDNA sequencing protocol. Resistant fraction  
 367 samples are treated with a series of physical, enzymatic, and chemical lysis steps to  
 368 deplete vegetative cells. DNA from bulk community and resistant fraction samples are  
 369 extracted via a mechanical lysis protocol, and 16S rDNA libraries prepared.  
 370 Communities are analyzed to determine the change in abundance of each OTU in the  
 371 resistant fraction relative to the bulk community. (right) Phase contrast images of bulk  
 372 community and resistant fraction – phase bright cells are endospores. Endospores stain  
 373 green when heat fixed with malachite green, vegetative cells appear red from safranin  
 374 counter stain. (B) Representative results of 16S rDNA profile for bulk community and  
 375 endospore-enriched samples. Reads from each OTU are summed across 24 individuals  
 376 to give a meta-bulk and meta-endospore community. Phylogenetic classes in black text  
 377 increase with resistant fraction; gray text classes decrease with resistant fraction. (C)  
 378 Distribution of resistant fraction proportion across phyla aggregated across individuals  
 379 filtered to remove OTUs with single counts in a sample (for visualization purposes).  
 380 Colors represent phyla. OTUs with a resistant fraction proportion of 0 are absent from

381 the resistant fraction; OTUs with a resistant fraction proportion of 1 are absent from the  
382 bulk community and only found in the resistant fraction.  
383

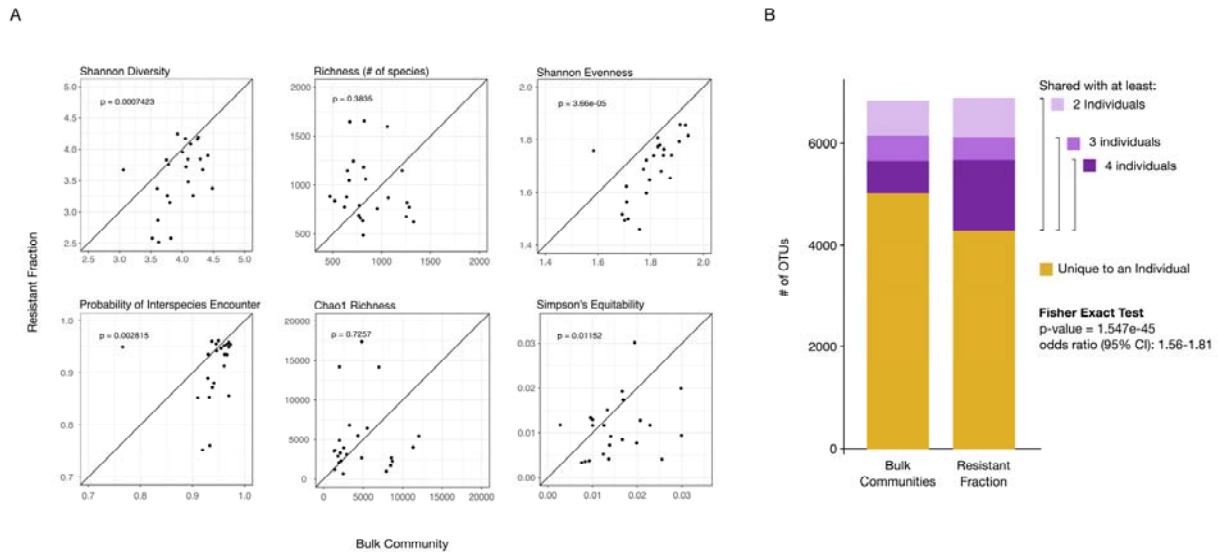

384

385 **Figure 2. Resistant fraction OTUs are more shared across individuals than bulk**  
386 **community OTUs.** (A) Alpha diversity metrics measured for the bulk community (x-  
387 axis) and resistant fraction enrichments (y-axis). P-values are for the test of differences  
388 between alpha-diversity metric distributions using paired Wilcoxon Rank Sum Test. (B)  
389 The number of OTUs found in only a single individual in the bulk communities and  
390 endospore enrichments are indicated in orange. The number of OTUs found in more  
391 than one individual are indicated through varying shades of purple. The odds ratio for  
392 the ratio of shared OTUs to unique OTUs for the endospore enrichments compared to  
393 the bulk communities is 1.69.

394

395

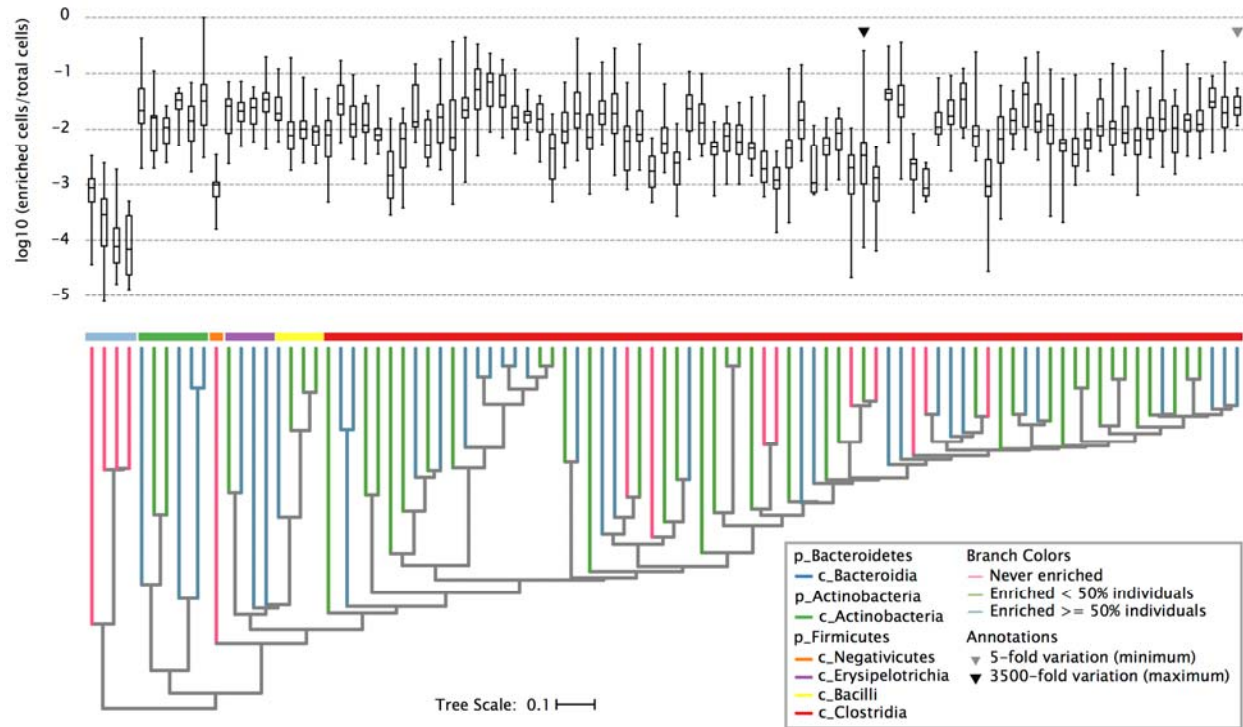

396  
397

398 **Figure 3. Taxa show heterogeneous patterns of resistant cell fractions across**  
399 **individuals.** Phylogenetic placement of the fraction of resistant organisms for taxa  
400 present within at least 8 individuals estimated by the ratio of counts scaled by qPCR-  
401 estimates of biomass in the resistant fractions and bulk communities. Tree branch  
402 colors represent the degree to which a taxonomic group was enriched in the resistant  
403 fraction with pink branches never enriched and blue and green branches enriched at  
404 least once. Classes within each phylum are shown with a colored bar. Arrows indicate  
405 OTUs showing the maximum (black) and minimum (gray) within-OTU variability in  
406 enrichment scores.

407

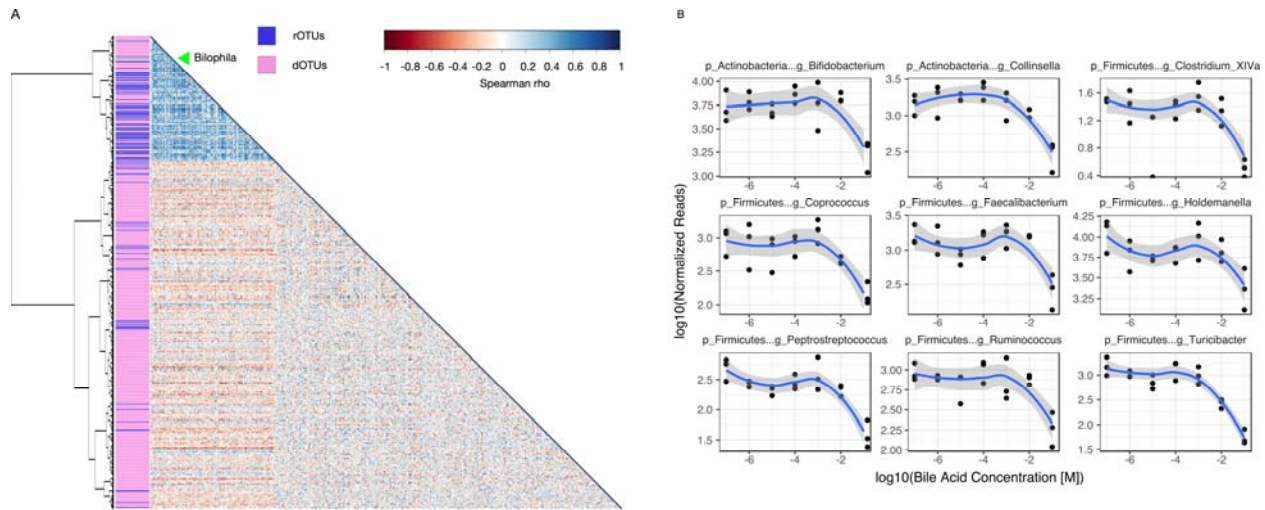

408

409

410 **Figure 4. Common signals govern resistant state exit and growth in the GI tract.**

411 (A) Correlation matrix of OTU time series data within a single individual's bulk

412 community hierarchically clustered (Ward's D) by Spearman correlation profile to other

413 OTUs over time; bars at the tips of the Ward hierarchical cluster represent rOTUs

414 (blue), nOTUs (pink), *Bilophila* (green). Strength of the correlation varies from red

415 (perfectly anti-correlated) to blue (perfectly correlated). (B) Abundance of OTUs in the

416 resistant fraction as a function of bile acid exposure for nine phylogenetically distant

417 OTUs.

418

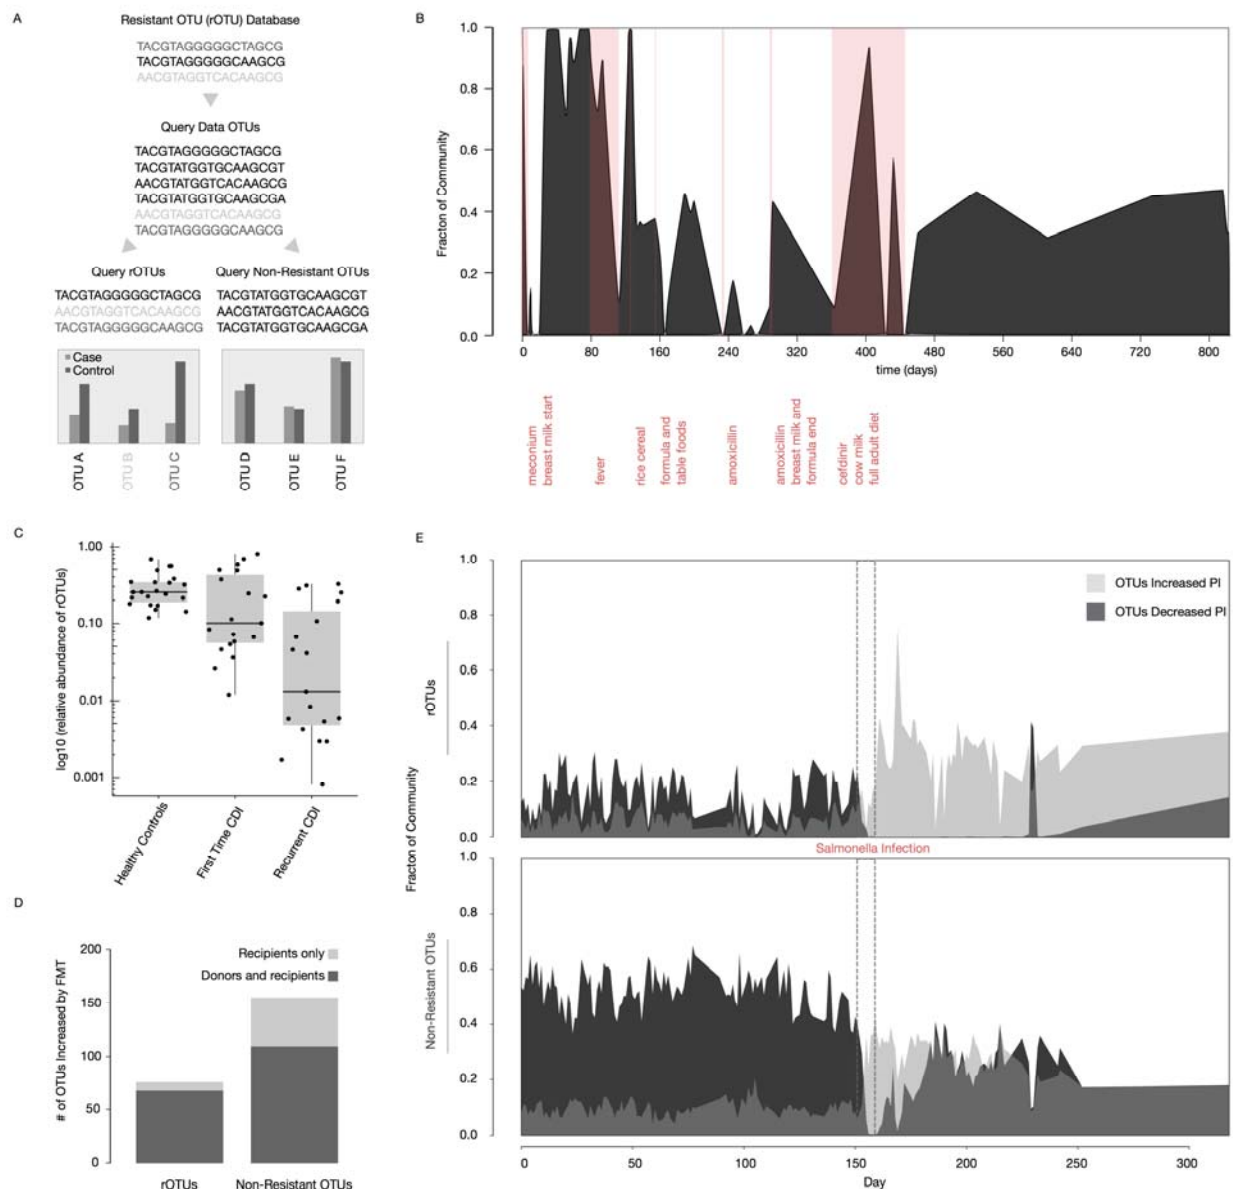

419  
420 **Figure 5. Resistant OTUs show disproportionate turnover in diverse contexts.** (A)  
421 Overview of approach for identifying resistant-cell forming OTUs in 16S rDNA  
422 sequencing datasets. rOTU database sequences are matched to sequences in other  
423 datasets, and then patterns within those datasets among the identified rOTUs are  
424 determined. (B) Fraction of rOTUs present during microbial colonization of an infant gut  
425 annotated with major diet and health perturbations. rOTUs encompass both putative  
426 endospore-forming organisms and those not known to form endospores, but which  
427 possess a resistant state (Actinobacteria and non-endospore-forming Firmicutes) (C)  
428 Fraction of rOTUs present as a function of *C. difficile* infection status (fCDI = first time *C.*  
429 *difficile* diagnosis, rCDI = at least 3 episodes of *C. difficile* infection following initial  
430 treatment) (D) Fraction of rOTUs and all other OTUs (non-resistant OTUs) transferred  
431 from donors to recipients by fecal microbiota transplant. (E) Time series of rOTUs (top)  
432 and all other (non-resistant) OTUs (bottom) from a human male infected with



433 Salmonella, with OTUs significantly more abundant pre-infection (dark gray) and  
434 significantly more abundant post-infection (light gray).  
435

436

437 **MATERIALS AND METHODS**

438

439 *Contact for reagent and resource sharing*

440

441 Further information may be obtained from the Lead Contact Eric J. Alm (Email:

442 [ejalm@mit.edu](mailto:ejalm@mit.edu); address: Massachusetts Institute of Technology Cambridge, MA,

443 02139, USA)

444

445 *Experimental Model and Subject Details*

446

447 **Human Subjects**

448

449 Human subject enrollment and sample collection was approved by the Institutional

450 Review Board of the Massachusetts Institute of Technology (IRB Approval Number:

451 1510271631). Informed consent was obtained from all subjects. 12 male and 12 female

452 healthy human subjects (age range 21-65) with no history of antibiotic use in the last six

453 months were enrolled in the study. In total, 24 fecal samples were collected from these

454 individuals and an additional 24 fecal samples were collected from one male individual

455 (age 24) over 24 days for culturing and DNA isolation.

456

457 **Bacterial Cell Culture Conditions**

458

459 Identities and culture purity of bacterial species were confirmed by Sanger sequencing  
460 of the 16S rRNA genes followed by comparison to sequences in public databases.  
461 Bacteria were grown in their respective media for all experiments except where  
462 otherwise detailed. For routine culture, frozen glycerol stocks of each strain are first  
463 streaked onto agar supportive of growth before inoculation of single colonies into liquid  
464 medium. All bacteria were grown to log-phase at 37° C under anaerobic conditions  
465 (atmosphere 85% N<sub>2</sub>, 5% H<sub>2</sub>, 10% CO<sub>2</sub>), except when preparing endospores.

466

467 *Method Details*

468

#### 469 **Fecal Sample Processing and Storage**

470

471 Fecal samples were collected and processed in a biosafety cabinet within 30 minutes of  
472 defecation. Samples (5 g) were suspended in 20 mL of 1% sodium hexametaphosphate  
473 solution (a flocculant) in order to bring biomass into solution as described previously<sup>26</sup>.  
474 Fecal samples were bump vortexed with glass beads to homogenize, and centrifuged at  
475 50 x g for 5 min at room temperature to sediment particulate matter and beads.  
476 Triplicate aliquots of 1 mL of the supernatant liquid were transferred into cryovials and  
477 stored at -80° C until processing. For the time series, samples were collected at  
478 approximately 24-hour intervals to reduce variation from uneven sampling frequency.

479

#### 480 **Resistant Fraction Enrichment from Fecal Samples**

481

482 We modified a previously published method<sup>26</sup> for endospore sequencing to increase  
483 throughput and decrease signal from contaminating, non-endospore forming organisms.  
484 Fecal samples previously frozen at -80° C were thawed at 4° C prior to use, and 500 µL  
485 was aliquoted for resistant fraction, while the remaining 500 µL was saved for bulk  
486 community DNA extraction. Samples were centrifuged at 4° C and 10,000 x g for 5  
487 minutes, washed and then resuspended in 1 mL Tris-EDTA pH 7.6. Samples were  
488 heated at 65° C for 30 minutes with shaking at 100 rpm and then cooled on ice for 5  
489 minutes. Lysozyme (10 mg/mL) was added to a final concentration of 2 mg/mL and the  
490 samples were incubated at 37° C for 30 minutes with shaking at 100 rpm. At 30  
491 minutes, 50 µL Proteinase K (>600 mAU/ml) (Qiagen) was added and the samples  
492 incubated for an additional 30 minutes at 37° C. Next, 200 µL 6% SDS, 0.3 N NaOH  
493 solution was added and the samples incubated for 1 hour at room temperature with  
494 shaking at 100 rpm. Samples were then centrifuged at 10,000 rpm for 30 minutes. At  
495 this step, a pellet containing resistant endospores should be visible or slightly visible in  
496 the sample, and the pellet is washed three times at 10,000 x g with 1 mL chilled sterile  
497 ddH<sub>2</sub>O. The pellet is then resuspended in 100 µL ddH<sub>2</sub>O, and treated with 2 µL DNase  
498 I (Ambion) to remove residual contaminating DNA with incubation at 37° C for 30 min.  
499 The DNase is killed by addition of 10 µL Proteinase K (Qiagen) and incubation at 50° C  
500 for 15 minutes, followed by incubation at 70° C for 10 minutes to inactivate Proteinase  
501 K. At this step, microscopic examination of samples is used to confirm the presence of  
502 phase-bright (or phase-dark) spores. The sample is then ready for downstream  
503 extraction and sequencing.  
504

## 505 **Extraction of Nucleic Acids**

506

507 We extracted DNA from both the original sample suspended in sodium  
508 hexametaphosphate and the output of the resistant fraction. Both the original sample  
509 and the resistant fraction were extracted with MoBio PowerSoil Isolation Kit (MoBio  
510 Laboratories, Inc.) with three 10 minute bead-beating steps followed by sequential  
511 collection of  $\frac{1}{3}$  of the solution to enhance recovery of endospore DNA as shown  
512 previously<sup>46</sup>. DNA was extracted from bacterial pure cultures, fecal enrichment cultures,  
513 and endospores using the same protocol as for fecal samples in order to achieve  
514 consistency between the methods. DNA from bacterial colonies for 16S rDNA Sanger  
515 sequencing confirmation or qPCR was obtained by homogenizing colonies in alkaline  
516 polyethylene glycol buffer as described previously<sup>47</sup>.

517

## 518 **16S rDNA Library Preparation and Sequencing**

519

520 Libraries for paired-end Illumina sequencing were constructed using a two-step 16S  
521 rRNA PCR amplicon approach as described previously with minor modifications<sup>48</sup>. The  
522 first-step primers (PE16S\_V4\_U515\_F, 5' ACACG ACGCT CTTCC GATCT YRYRG  
523 TGCCA GCMGC CGCGG TAA-3'; PE16S\_V4\_E786\_R, 5'-CGGCA TTCCT GCTGA  
524 ACCGC TCTTC CGATC TGGAC TACHV GGGTW TCTAA T 3') contain primers U515F  
525 and E786R targeting the V4 region of the 16S rRNA gene, as described previously<sup>48</sup>.  
526 Additionally, a complexity region in the forward primer (5'-YRYR-3') was added to help  
527 the image-processing software used to detect distinct clusters during Illumina next-

528 generation sequencing. A second-step priming site is also present in both the forward  
529 (5'-ACACG ACGCT CTTCC GATCT-3') and reverse (5'-CGGCA TTCCT GCTGA  
530 ACCGC TCTTC CGATC T-3') first-step primers. The second-step primers incorporate  
531 the Illumina adapter sequences and a 9-bp barcode for library recognition (PE-III-PCR-  
532 F, 5'-AATGA TACGG CGACC ACCGA GATCT AACT CTTTC CCTAC ACGAC  
533 GCTCT TCCGA TCT 3'; PE-III-PCR-001-096, 5'-CAAGC AGAAG ACGGC ATACG  
534 AGATN NNNNN NNNCG GTCTC GGCAT TCCTG CTGAA CCGCT CTTCC GATCT 3',  
535 where N indicates the presence of a unique barcode.

536 Real-time qPCR before the first-step PCR was done to ensure uniform amplification and  
537 avoid overcycling all templates. Both real-time and first-step PCRs were done similarly  
538 to the manufacturer's protocol for Phusion polymerase (New England BioLabs, Ipswich,  
539 MA). For qPCR, reactions were assembled into 20  $\mu$ L reaction volumes containing the  
540 following: DNA-free H<sub>2</sub>O, 8.9  $\mu$ L, HF buffer, 4  $\mu$ L, dNTPs 0.4  $\mu$ L, PE16S\_V4\_U515\_F (3  
541  $\mu$ M), 2  $\mu$ L, PE16S\_V4\_E786\_R (3  $\mu$ M) 2  $\mu$ L, BSA (20 mg/mL), 0.5  $\mu$ L, EvaGreen (20X),  
542 1  $\mu$ L, Phusion, 0.2  $\mu$ L, and template DNA, 1  $\mu$ L. Reactions were cycled for 40 cycles  
543 with the following conditions: 98° C for 2 min (initial denaturation), 40 cycles of 98 C for  
544 30 s (denaturation), 52° C for 30 s (annealing), and 72° C for 30s (extension). Samples  
545 were diluted based on qPCR amplification to the level of the most dilute sample, and  
546 amplified to the maximum number of cycles needed for PCR amplification of the most  
547 dilute sample. For first step PCR, reactions were scaled (EvaGreen dye excluded, water  
548 increased) and divided into three 25- $\mu$ l replicate reactions during both first- and second-  
549 step cycling reactions and cleaned after the first-and second-step using Agencourt  
550 AMPure XP-PCR purification (Beckman Coulter, Brea, CA) according to manufacturer

551 instructions. Second-step PCR contained the following: DNA-free H<sub>2</sub>O, 10.65 μL, HF  
552 buffer, 5 μL, dNTPs 0.5 μL, PE-III-PCR-F (3 μM), 3.3 μL, PE-III-PCR-XXX (3 μM) 3.3  
553 μL, Phusion, 0.25 μL, and first-step PCR DNA, 2 μL. Reactions were cycled for 10  
554 cycles with the following conditions: 98° C for 30 s (initial denaturation), 10 cycles of 98°  
555 C for 30 s (denaturation), 83° C for 30 s (annealing), and 72° C for 30s (extension).  
556 Following second-step clean-up, product quality was verified by DNA gel  
557 electrophoresis and sample DNA concentrations determined using Quant-iT PicoGreen  
558 dsDNA Assay Kit (Thermo Fisher Scientific). The libraries were multiplexed together  
559 and sequenced using the paired-end with 250-bp paired end reads approach on the  
560 MiSeq Illumina sequencing machine at the BioMicro Center (Massachusetts Institute of  
561 Technology, Cambridge, MA).

562

### 563 **qPCR**

564 For testing of the resistant fraction protocol, qPCR was carried out as described in the  
565 **16S rDNA Library Preparation and Sequencing** section. Total bacterial abundance  
566 was quantified using the same primers. For quantification of Firmicutes and  
567 Actinobacteria, primer sequences were obtained from<sup>49</sup>. Primers were used at the same  
568 concentrations as 16S primers, and annealing temperatures were adjusted to the  
569 appropriate temperature for the corresponding primer pairs.

570

### 571 **16S rDNA Sequence Data Processing and Quality Control**

572 Paired-end reads were joined with PEAR<sup>50</sup> using default settings. Sequence data files  
573 were processed using a custom amplicon sequencing pipeline. Sequences at least 252  
574 bp long after quality filtering (quality trim Q25) were retained. After quality filtering, the  
575 complexity region between the adapters and the primer along with the primer sequence,  
576 was removed. All sequences not matching the first 15 bases of the primer were  
577 removed. Sequences were trimmed to 252 base pairs and clustered at 100% identity  
578 with UCLUST. OTUs were classified using RDP<sup>51,52</sup>. Sequences that had fewer than 10  
579 reads across individuals were excluded from downstream analysis. The resulting count  
580 tables were used as input for analysis within R.

581

## 582 **Identifying High Confidence Endospore-Forming & Resistant OTUs**

583

584 We developed a workflow for identifying organisms showing increased abundance in  
585 the resistant fraction relative to the bulk community. We use as input an OTU table with  
586 normalized counts obtained using cumulative sum scaling as implemented in the  
587 package metagenomSeq in R, which improves estimation of true differences between  
588 samples that would be lost in scaling to the total number of reads due to differences in  
589 read depth<sup>53</sup>. Because of biases due to PCR amplification and sequencing and within  
590 OTU-heterogeneity, we avoided making strong quantitative claims about the proportions  
591 of spores formed by any given OTU. Instead, we examined the frequency with which an  
592 OTU was enriched in the endospore-enriched fraction outside of Poisson noise within  
593 individuals. More precisely, we used the counts of an OTU in the bulk community and in  
594 the resistant fraction to estimate the Poisson variance – if the difference between counts



595 was within a pre-specified (we used 2 standard deviations) window of the estimated  
596 variance, we excluded calculations on such OTUs within a sample. Next, because there  
597 were several OTUs found in the resistant fraction that were absent from the bulk  
598 community, we excluded calculations involving these OTUs, which would fail to provide  
599 a finite estimate of the level of resistant fraction and would have apparently deflated  
600 prevalence in the bulk community samples. For the remaining OTUs, an enriched OTU  
601 was one that had more counts in the resistant fraction than in the bulk community and  
602 an unenriched OTU was one that had fewer counts in the resistant fraction than in the  
603 bulk community. The level of enrichment was calculated as the ratio of counts in the  
604 resistant fraction to the sum of counts in the bulk community and in the resistant  
605 fraction.

606

607 To compile a list of high-confidence resistant fraction-enriched organisms, we took a  
608 similar strategy as before, but also included OTUs which had 0 counts in the bulk  
609 community but non-zero counts in the resistant fraction. The OTUs increased in  
610 abundance in the resistant fraction compared to the bulk community in more than half of  
611 the samples present (excluding singletons) were included in this list.

612

### 613 **Prevalence and abundance comparisons**

614

615 To compare prevalence among OTUs in the resistant fraction and the bulk community,  
616 we counted the number of times an OTU had non-zero abundance in one of our  
617 subjects in either the resistant fraction or the bulk community. We used the Mann-

618 Whitney U test both to check for differences in read depth across the fractions and to  
619 compare the centers of these distributions. In order to compare prevalence of OTUs  
620 categorized as enriched to those categorized as unenriched (again excluding  
621 singletons), we used the Mann-Whitney U test on the prevalence estimated for these  
622 OTUs within the bulk community across the categories.

623

624 To determine the effect of abundance on prevalence estimations as above, we ran  
625 binomial logistic regression with log-transformed normalized counts within the bulk  
626 community as the predictor variable and endospore-enrichment status (rOTU or nOTU)  
627 as the binary response variable. A significantly positive slope indicates that endospore-  
628 enriched organisms are more likely than unenriched to derive from abundant organisms  
629 in the bulk community.

630

### 631 **Genomic Spore Gene Content**

632 Protein sequences in *Bacillus subtilis subtilis* 168 from genes identified as shared  
633 among all spore-forming Bacilli and Clostridia<sup>31</sup> were downloaded from UniProt  
634 (<http://www.uniprot.org/>) to make a spore gene database. All genomes as of August  
635 2016 from 9 genera of the Clostridia in containing OTUs that were both significantly  
636 enriched at times in the resistant fraction and significantly unenriched were downloaded  
637 from NCBI. A standard tblastn approach was used to identify homologues in the  
638 downloaded genomes with the corresponding genes in the spore gene database. After  
639 identifying presence/absence of spore genes, genome spore gene profiles were  
640 hierarchically clustered using UPGMA on the binary distance (Jaccard) matrix.

641

## 642 **Metabolite profiling**

643 Metabolites were measured using liquid chromatography tandem mass spectrometry  
644 (LC-MS) method operated on a Nexera X2 U-HPLC (Shimadzu Scientific Instruments;  
645 Marlborough, MA) coupled to a Q Exactive hybrid quadrupole orbitrap mass  
646 spectrometer (Thermo Fisher Scientific; Waltham, MA) methods. Stool samples  
647 (200mg/mL in 1% sodium hexametaphosphate) were homogenized using a TissueLyser  
648 II (Qiagen). Stool homogenates (30  $\mu$ L) were extracted using 90  $\mu$ L of methanol  
649 containing PGE2-d4 as an internal standard (Cayman Chemical Co.; Ann Arbor, MI)  
650 and centrifuged (10 min, 10,000 x g, 4°C). The supernatants (2  $\mu$ L) were injected onto a  
651 150 x 2.1 mm ACQUITY UPLC BEH C18 column (Waters; Milford, MA). The column  
652 was eluted isocratically at a flow rate: 450 $\mu$ L/min with 20% mobile phase A (0.1% formic  
653 acid in water) for 3 minutes followed by a linear gradient to 100% mobile phase B  
654 (acetonitrile with 0.1% formic acid) over 12 minutes. MS analyses were carried out  
655 using electrospray ionization in the negative ion mode using full scan analysis  
656 over  $m/z$  70-850 at 70,000 resolution and 3 Hz data acquisition rate. Additional MS  
657 settings were: ion spray voltage, -3.5 kV; capillary temperature, 320°C; probe heater  
658 temperature, 300 °C; sheath gas, 45; auxiliary gas, 10; and S-lens RF level 60. Raw  
659 data were processed using TraceFinder 3.3 (Thermo Fisher Scientific; Waltham, MA)  
660 and Progenesis QI (Nonlinear Dynamics; Newcastle upon Tyne, UK) software for  
661 detection and integration of LC-MS peaks.

662

## 663 **Bile germination tests**

664

665 Treatment of fecal samples with ethanol has previously been shown to allow culture-  
666 based recovery of endospore-forming organisms<sup>2</sup>. To this end, fresh fecal samples  
667 were homogenized in 50% ethanol (250 mg/mL), incubated for 1 hour under aerobic  
668 conditions with shaking at 100 rpm, and washed three times (5 min, 10,000 x g) with  
669 sterile water to remove residual ethanol. Serial dilutions from 1e-4-10% (w/v) bile bovine  
670 oxgall (Sigma) were prepared in sterile water and 2.5 mL ethanol-treated fecal  
671 suspension mixed in triplicate with 2.5 mL each of these bile solutions. Samples were  
672 incubated under aerobic conditions for 2 hours at 37° C with 200 rpm shaking, and then  
673 transferred to -80° C prior to resistant fraction extraction and 16S rDNA library  
674 preparation.

675

### 676 **Bile germination analysis**

677

678 We transformed 16S rDNA sequencing counts generated by the bile germination tests  
679 again using the cumulative sum-scaling transformation<sup>53</sup>. Under the assumption that  
680 cells in the resistant fraction can only decrease or remain the same during treatment,  
681 we searched for negative relationships between bile acid concentration and abundance  
682 that would indicate and OTU had germinated. To identify significant negative  
683 relationships, we first fit a generalized linear model (GLM) with a log-link quasi-Poisson  
684 distribution to the normalized counts of OTUs present in the control sample with bile  
685 acid concentration as the predictor variable. We then identified the OTU with the  
686 strongest positive trend in the data (that with the highest positive slope and lowest p-

687 value). We assume that OTUs increase due only to compositional effects (that is, this  
688 OTU has not germinated but its abundance apparently increases due to loss of other  
689 OTUs), and we use the slope estimated from the fit of this model to detrend the other  
690 dose-response data so as to constrain the abundance of this apparently increasing OTU  
691 to be constant. We do so by dividing counts of all OTUs by  $\exp(\text{slope} \times \text{bile acid}$   
692  $\text{concentration})$ , which is also a measure of the depletion of the endospore-enrichment  
693 biomass. From this detrended dose-response data, we again fit a quasipoisson GLM  
694 and identify putatively germinating OTUs as those having a significant ( $p < 0.05$ )  
695 negative slope.

696

### 697 **Analysis of Infant Gut Time Series**

698

699 SRA files containing 16S rDNA Sequences were downloaded from Genbank under  
700 accession no. [SRA012472](#))<sup>40</sup>. Sequences were generated using a Roche 454  
701 pyrosequencer. In order to simplify analysis of the dataset, these sequences were again  
702 processed using the protocol outlined for processing of the original dataset in this paper.  
703 However, sequences were quality trimmed using Q20 to 230 base pairs, and the  
704 retained sequences were used to call 100% OTUs. OTUs were assigned taxonomies  
705 using RDP and 100% OTUs were collapsed into taxonomic names. As very few  
706 sequences matched between datasets when using uclust, these taxonomic names were  
707 instead used to identify organisms as potential resistant cell-formers based on the  
708 correspondence to the RDP-assigned taxonomic names of high confidence resistant  
709 cell-formers identified previously. While this approach loses information given the noted

710 heterogeneity in resistance phenotypes even among closely related strains, the original  
711 sequences themselves are still proxies for having this phenotype, and so the results of  
712 such analysis must be interpreted keeping this observation in mind.

713

714 The relative abundance of organisms identified in the infant gut time series as putative  
715 resistant-cell formers were summed, and the dynamics of this resistant cell-forming  
716 population in the infant gut was visualized over time.

717

718 **Analysis of 16S rDNA sequence files from first time and recurrent *C. difficile***  
719 **infection**

720

721 The open reference 97% OTU table including RDP taxonomic annotations from  
722 Allegretti et al 2016 was used for this analysis<sup>43</sup>. OTU IDs were mapped using uclust to  
723 the corresponding genus level OTUs identified as rOTUs from this study. Patients were  
724 grouped either as healthy, first-time *C. difficile* infection (fCDI), or recurrent *C. difficile*  
725 *infection* (rCDI), and the fraction of rOTUs was calculated by summing their relative  
726 abundances within each patient. A Mann Whitney U test was used to determine whether  
727 there were significant differences in the total relative abundance of rOTUs across  
728 groups with a Bonferroni multiple hypothesis test correction.

729

730 **Analysis of 16S rDNA sequence files from fecal microbiota transplant in relapsing**  
731 ***C. difficile* infection**

732

733 This dataset was obtained from Youngster et al, 2014<sup>44</sup>. To simplify analysis, an existing  
734 closed-reference GreenGenes 97% OTU table generated by the original authors was  
735 used. Closed-reference OTU IDs were mapped back to GreenGenes reference  
736 sequences, and sequences were assigned to the resistant cell-former database  
737 sequences again using uclust as for the adult time series.

738

739 Unique pre-FMT, post-FMT, and donor samples were separated in the dataset. We  
740 again identified organisms that had significantly different relative abundance (Benjamini-  
741 Hochberg adjusted Mann-Whitney U test  $p < 0.05$ ) across the groups for our analysis.  
742 We again obtained four categories of OTUs: nonresistant and resistant cell-formers that  
743 were elevated in the donor and the post-FMT samples relative to the pre-FMT samples.  
744 We used the Fisher exact test on the contingency table containing the number of OTUs  
745 in each of the previously mentioned categories to identify whether OTU engraftment  
746 from the donor was different across the groupings.

747

748 **Analysis of 16S rDNA sequence files in adult time series pre- and post-**  
749 **Salmonella Infection**

750

751 Illumina HiSeq sequencing files containing 16S rDNA sequences from the stool of a  
752 healthy adult male<sup>45</sup> were downloaded and processed as described for the original  
753 dataset in this paper, except that sequences were trimmed to 101 base pairs as  
754 described previously before calling 100% OTUs due to the use of shorter read  
755 sequencing technology. Sequences were assigned to the resistant cell-former database

756 sequences using uclust constrained with the parameters: --id 99 --usersort --libonly, in  
757 order that sequences from this dataset would be assigned only to resistant cell-formers.

758

759 In order to assess the presence of differential turnover between resistant and non-  
760 resistant cell formers in this dataset, we identified organisms that had significantly  
761 different relative abundance (Benjamini-Hochberg adjusted Mann-Whitney U test  $p <$   
762  $0.05$ ) before Salmonella infection starting at day 151 (days 0-150) and after the end of  
763 infection at day 159 (days 160-252). We partitioned these OTUs into four sets for our  
764 analysis: non-resistant and resistant cell formers whose median abundance was higher  
765 post-infection and those whose median abundance was lower post-infection. We used  
766 the Fisher exact test on the contingency table containing the number of OTUs in each of  
767 the previously mentioned categories to identify whether the OTU turnover was different  
768 across the groupings.

769

770 *Supplementary Methods*

771

## 772 **Preparation of Endospores of *Bacillus subtilis***

773

774 Endospores of *B. subtilis* for testing resistant fraction protocols were prepared as  
775 described previously<sup>54</sup>. *B. subtilis subtilis* strain AG174 (kindly provided by Alan  
776 Grossman, MIT) was streaked onto nutrient agar and grown overnight. A single colony  
777 was inoculated into 25 mL Difco Sporulation Medium (DSM), and grown at 37° C until  
778 mid-log phase (OD600 = 0.5), and diluted 1:10 into 250 mL of pre-warmed 37° C DSM



779 in a 2 L flask. Cells were grown for 48 hrs at 37° C and 150 rpm under aerobic  
780 conditions. When 90% of cells were free phase-bright spores, cultures were centrifuged  
781 at 10,000 x g and washed twice with 200 mL 4 C sterile distilled water. The pellet was  
782 resuspended in 200 mL cold distilled water and left at 4° C overnight, before repeating  
783 the washing procedure. No further purification steps were used as only spores were  
784 observed with microscopic examination. Spore viability and counts were confirmed by  
785 germination and growth after 24 hours on nutrient agar at 37° C.

786

### 787 **Fluorometric Quantification of Dipicolinic Acid Content**

788

789 Fecal samples were thawed at 4° C and 10 □mg (50 □L) suspended in 0.9 □ml sodium  
790 acetate buffer and 0.1 □ml aluminium chloride (AlCl<sub>3</sub>, 0.5 □M) as described previously<sup>50</sup>.  
791 Samples were microwaved in microcentrifuge tubes for 20 s to disrupt endospores.  
792 After cooling on ice for 10 minutes, samples were centrifuged at 10,000 x g for 10 min,  
793 and 100 □ □L of the sample supernatant mixed with 100 □ □L terbium chloride solution  
794 (TbCl<sub>3</sub>, 30 □ □M) in clear-bottom black 96-well microtiter plates. Fluorescence was  
795 immediately measured using a plate reader (Synergy H1) with the following settings:  
796 time-resolved fluorescence (delay 50 □ □μs, interval 1200 □ □ μs) at an excitation  
797 wavelength of 272 □ □nm, emission wavelength of 545 □ □nm, and 10 endpoint readings per  
798 sample at 30°C. The number of spores in the samples was determined using standard  
799 addition method with endospores of *B. subtilis* or dipicolinic acid. Endospore content  
800 was expressed as equivalents of *B. subtilis*.

801

802

### 803 **Fecal spore-former culture library & isolate revival**

804

805 Thousands of isolates were collected from 12 healthy donor fecal samples (manuscript  
806 in preparation), and isolates from a single donor from the cohort in this study was used  
807 for all isolate experiments. Fecal material was diluted 1:15 in anaerobic PBS + 0.1% L-  
808 cysteine and homogenized in an anaerobic chamber (Coy Anaerobic Systems, 20%  
809 CO<sub>2</sub>; 5% H<sub>2</sub>; 75% N<sub>2</sub>). 500 ul aliquots of the homogenized fecal material were stored in  
810 50% glycerol at -80 C for continued culturing. Samples were treated with equivolume  
811 amounts of 100% ethanol for 1 hour, and serial dilutions were plated on Gifu Anaerobic  
812 Medium (GAM) or Brain Heart Infusion, Supplemented (BHIS) (citation). Individual  
813 colonies were selected after 24 hours of growth under anaerobic conditions at 37° C,  
814 and re-streaked onto fresh agar plates. Single colonies were grown in liquid medium,  
815 and archived in 50% glycerol at -80° C. Aliquots of liquid culture were taken for 16S  
816 rDNA Sanger Sequencing by first amplifying with the 27F (5'-  
817 AGAGTTTGATCMTGGCTCAG-3') and 1492R (5'-TACGGYTACCTTGTTACGACTT-3')  
818 primers, and then submitted with the U515F (5'-GTGCCAGCMGCCGCGGTAA-3')  
819 internal primer. Sequences were assigned taxonomy using the RDP database <sup>51,52</sup>.

820

### 821 **Testing Resistance of Actinobacteria**

822

823 For revival, frozen glycerol stocks of bacteria were streaked in an anaerobic chamber  
824 onto pre-reduced (24 h) BHIS or GAM agar medium and incubated overnight under

825 anaerobic conditions at 37° C. For testing Actinobacteria isolates for lysis resistance,  
826 plates with revived organisms were incubated for 4 weeks under anaerobic conditions at  
827 room temperature to induce nutrient starvation. Plates were scraped of colonies and  
828 colonies resuspended in 1% sodium hexametaphosphate and subjected to spore  
829 enrichment as described previously. Results from these experiments in Supplementary  
830 Figure 3A.

831

## 832 **SUPPLEMENTARY RESULTS AND DISCUSSION**

833

### 834 *Quantification of fecal-resident endospores*

835

836 Although endospore-forming organisms are dominant in the gastrointestinal tract, the  
837 abundance of endospores has not been well quantified. Using a unique marker of  
838 endospores, dipicolinic acid, others have estimated a range in human fecal samples  
839 between 1e06 and 1e09 endospores per gram wet weight of stool<sup>56</sup>, with a geometric  
840 mean of 1e08. With the same protocol, we estimate the endospore burden at 1.5e07-  
841 4.0e09 (95% CI) endospores per gram, which represents 0.03-0.7% (95% CI)  
842 endospores per cell estimated by qPCR (Supplementary Figure 2).

843

844 Using modifications on previously described methods<sup>26</sup>, we depleted vegetative cells in  
845 human fecal samples to enrich for resistant cells (Fig 1A). By qPCR on this resistant  
846 fraction, our estimate of the resistant cell fraction is slightly higher than that given by  
847 dipicolinic acid quantification: 2e08-7e09 (95% CI) resistant cells per gram

848 (Supplementary Figure 2A), giving 0.2%-27% resistant cells per cell (Supplementary  
849 Figure 2B). Culture-based studies of germinable endospores widen these estimates and  
850 generally deplete them finding 1e05-1e09 germinable endospores per gram of stool,  
851 giving a wide range of 0.3-140% endospores per cell. We assume that most fecal  
852 samples contain at least 1e07 (and at most 1e12) endospores, which is roughly 100  
853 times the infectious dose for endospores of *C. difficile*.

854

855 *Most Clostridial OTUs in the resistant fraction show genetic capacity for sporulation*

856

857 Many prominent gut commensals, including members of the genera *Faecalibacterium*  
858 apparently form endospores *in vivo* and have most of the genes to do so  
859 (Supplementary Table 1, 5, and Supplementary Figure 6), but have not been shown to  
860 form endospores *in vitro*<sup>57</sup>. We believe that for *Faecalibacterium* species as for  
861 endospores of *P. larvae* and *C. perfringens*, *in vivo* conditions drive endospore  
862 formation, and these conditions are not readily replicated *in vitro*. Despite being an  
863 extensively studied, numerically abundant, prevalent, and disease-relevant commensal,  
864 endospore formation has not been demonstrated for this organism.

865

866 *Clostridial OTUs in general are more shared, whether present as rOTUs or nOTUs*

867

868 When restricting our analysis of prevalence to only the Clostridia, there is no difference  
869 in sharing between Clostridia rOTUs and nOTUs (Mann Whitney U Test, p-value =  
870 0.9952). The majority of the sharing signal is phylogenetic – when comparing

871 prevalence of non-Clostridia nOTUs to Clostridia nOTUs and rOTUs combined, the  
872 difference in prevalence is very pronounced (Mann Whitney U Test, p-value = 3.0e-24).  
873 Even Clostridia OTUs not identified as rOTUs may still contain organisms with the  
874 potential to enter resistant states, but may not necessarily be doing so in all individuals  
875 or at all times. Alternatively, other conserved phylogenetic traits within the Clostridia  
876 could contribute to the widespread sharing of these organisms, but because sporulation  
877 is required for transmission of *C. difficile*<sup>10</sup>, it seems possible that resistance is more  
878 broadly required for efficient transmission of the Clostridia in general.

879  
880 When assessing differential sharing of rOTUs and nOTUs determined from the time  
881 series within the cross-section, we again find that the sharing is primarily associated  
882 with the Clostridia, as there is no significant difference in sharing among time series-  
883 defined Clostridia nOTUs and rOTUs (Mann Whitney U Test p-value = 0.10). In part,  
884 this result arises because there is a high degree of overlap between the OTUs defined  
885 as rOTUs and nOTUs in the time series and in the cross-section. Although infrequent,  
886 there are 27 inconsistent classifications (rOTUs become nOTUs and vice versa) and  
887 268 consistent classifications between the time series and the cross-sectional data. Of  
888 the inconsistencies, all are Firmicutes, highlighting that endospore formation is likely  
889 driven by host- or strain-specific variability. However, it is clear that organisms linked to  
890 endospore formation are more prevalent across unrelated hosts.

891  
892 If we compare the abundance of rOTUs and nOTUs from the Clostridia, we still find that  
893 11/24 individuals have Clostridia rOTUs at a significantly lower abundance than nOTUs

894 (none have significantly higher rOTU than nOTU abundance). In general, when  
895 combining the independent tests of differences between the abundance of Clostridia  
896 nOTUs and rOTUs, we find a significant tendency for Clostridia rOTUs to be at lower  
897 abundance (Fisher's Method,  $\chi^2_{df=48} = 289.6$  p-value = 0, 0, all OTUs, Clostridia OTUs).

898

899 We wanted to determine if Clostridia drove a differential persistence signal in the time  
900 series. Comparing the persistence of only Clostridia nOTUs and rOTUs, we find that  
901 Clostridia nOTUs are significantly more persistent than rOTUs defined within the time  
902 series (Wilcoxon rank sum test, p-value = 2.5e-05), and for those Clostridia nOTUs and  
903 rOTUs shared with the cross-sectional data (Wilcoxon rank sum test, p-value = 2.4e-5).  
904 This result suggests a tradeoff in forming resistant cells and within-host persistence in  
905 this person. Only those Clostridia that are enriched in the resistant state have reduced  
906 within-host persistence. Similarly, the Actinobacteria (all of which are rOTUs) are also  
907 more ephemeral than nOTUs (p-value = 2.2e-5), suggesting a shared life history  
908 strategy in their resistance phenotype.

909

910 Organisms in Clostridium cluster XI (including *C. sordelli*, *C. scindens*, and *C. difficile*)  
911 link their growth with the concentration of bile acids in the colon. In the phylogenetically  
912 diverse group of organisms encompassed by Clostridium cluster IV (including the  
913 genera *Clostridium*, *Eubacterium*, *Ruminococcus*, *Coprococcus*, *Dorea*, *Lachnospira*,  
914 *Roseburia* and *Butyrivibrio*), many are linked to the production of secondary bile acids,  
915 and several also exhibit preferential growth in the mucus layer<sup>20,58</sup>. The enrichment for  
916 some of these organisms among rOTUs may then derive from initiation of vegetative

917 growth in the small intestine through bile acid-mediate germination, growth in the  
918 mucosa, limited growth in the lumen, and enhanced shedding of endospores into the  
919 lumen relative to vegetative cells – driving the observation of reduced abundance and  
920 persistence. These pieces of evidence suggested that the dynamics of rOTUs may be in  
921 part governed by bile acids and shared niche space, and as such, we expect these  
922 organisms to show similar dynamic behavior in other contexts.

923

924 *Differences in abundance drive differences in persistence*

925

926 The difference in persistence between rOTUs and nOTUs is largely attributable to a  
927 difference in relative abundance between these groups of organisms, with rOTUs  
928 having significantly lower median abundance than nOTUs in the time series (Mann  
929 Whitney U test, p-value = 3.8e-5). We recall that rOTUs across people tended to have  
930 lower median abundance than nOTUs. By comparing the abundance distributions of  
931 rOTUs and nOTUs within individuals, we find that this result holds for 16/24 individuals  
932 sampled (Mann Whitney U Test,  $p < 0.05$  for each test). Combining the results from  
933 these tests (Fisher's Method,  $X^2_{df=48} = 412.0$ , p-value = 0) suggests that overall,  
934 resistant OTUs are less abundant than non-resistant OTUs. We propose that the  
935 reduced abundance of rOTUs accompanies reduced persistence within a host  
936 associated with lysis resistance.

937

938 *Common microbiota is more likely to source from rOTUs than nOTUs*

939

940 Comparing the fractions of rOTUs and nOTUs present in each individual to assess  
941 sharing still reveals a tendency for increased sharing across individuals (Wilcoxon rank  
942 sum test, p-value = 4.3e-03, Supplementary Figure 3), meaning that individuals are  
943 more likely to source their microbiota from rOTUs than nOTUs. Similarly, comparing the  
944 frequency of appearance and disappearance of rOTUs and nOTUs in the time series  
945 gives the same observation of reduced persistence (Mann Whitney U Test, p-value =  
946 2.7e-13). Together, these results imply that resistance states enable increased  
947 prevalence at the cost of within-host abundance. Because of the heterogeneity in  
948 endospore formation within species groupings, this result weakens when grouping  
949 OTUs at the 99% level (100% OTUs used previously), but is still significant (p-value =  
950 8.6e-29, mean  $\rho$  = 0.083 (rOTUs), 0.047 (nOTUs)).

951

952 *Metabolomic correlations to Bilophila*

953

954 While there were no significant correlations between the *Bilophila* OTU and any  
955 individual bile acid in feces measured with untargeted metabolomics, it had a significant  
956 positive correlation (unadjusted p-value = 2.1e-06, Spearman  $\rho$  = 0.84) to a lipid marker  
957 of milk fat consumption, pentadecanoic acid<sup>59</sup>. Milk fat consumption, and not  
958 consumption of other kinds of fat, has previously been shown to lead to expansions of  
959 *Bilophila* in mouse models, which were correlated with increased taurocholate  
960 concentration in the gall bladder<sup>36</sup>. Thus, this particular OTU-metabolite relationship  
961 serves as an independent verification that experimentally validated relationships play  
962 out *in vivo*.



963

964 *Introduced endospore-formers compete with endogenous endospore-formers*

965

966 To further understand the dynamics of the endospore-forming fraction of the microbiota,  
967 the subject of the time series began taking tablets once daily (3e5 CFU/tablet) of a  
968 probiotic prepared as endospores (Miyarisan *Clostridium butyricum* Tablets) on day 6 of  
969 the time course. On day 8, an OTU corresponding to *C. butyricum* became detectable in  
970 both the bulk community and in the endospore fraction. These observations lead to two  
971 conclusions: (1) the endospores are capable of outgrowth *in vivo* in the presence of a  
972 complex community, and (2) the organisms are forming endospores *in vivo*, as the  
973 levels present in stool exceed the dose in the tablet. *C. butyricum* administered as  
974 endospores has previously been shown to prevent antibiotic-associated diarrhea in  
975 children (Seki et al., 2003), as well as to ameliorate DSS-induced colitis in mice through  
976 induction of IL-10 producing macrophages<sup>60</sup>, suggesting that it grows *in vivo*, and is  
977 sufficient to block colonization by pathogenic endospore-formers such as *C. difficile*.  
978 Given these properties, we wanted to examine the dynamic behavior of this organism *in*  
979 *vivo*, and relate it to the activity of endogenous endospore-formers.

980

981 When examining relationships of introduced *C. butyricum* to metabolites in the stool, we  
982 found a strong anti-correlation to pentadecanoic acid (unadjusted p-value = 6.3e-05,  $\rho$  =  
983 -0.72). Recall that *Bilophila* strongly correlated with pentadecanoic acid, and that most  
984 other endospore-formers fell into the correlation cluster containing *Bilophila*. By  
985 contrast, this OTU, which had been introduced as an endospore, exhibited the opposite

986 behavior. We believe that this result may be a signal of competitive exclusion: because  
987 endogenous endospore-forming commensals occupy the dominant niche, tethering their  
988 growth to shared signals, the introduced endospore-formers are restricted to a smaller,  
989 potentially orthogonal niche. Further work remains to determine the signals that mediate  
990 colonization of introduced endospores.

991

## 992 **EXTENDED DISCUSSION**

993

994 Anaerobic endospore-forming organisms dominate the mammalian gastrointestinal tract  
995 as no other studied environment. Why does this environment, compared to most others,  
996 favor the growth of organisms with a metabolically costly and risky strategy? While it  
997 seems obvious that this trait should increase transmission, and here we provide  
998 evidence for this effect through our observation of increased prevalence, it is not  
999 obvious that increased transmissibility is cost-free. We propose that a tradeoff exists in  
1000 maintaining a sporulation phenotype: endospore formation incurs diminished vegetative  
1001 growth, resulting in lower population sizes and thus decreased persistence within a host  
1002 due to a greater probability of extinction within. Because sporulation and presumably  
1003 other resistance traits seem to permit long-term survival outside of a host, this stability  
1004 provides a means for maintaining these resistant-cell formers within host populations  
1005 over time. By contrast, other strict anaerobic organisms in the gastrointestinal tract by  
1006 definition exhibit the opposite strategy: instead of investing in endospore formation, they  
1007 invest in larger population sizes that help maintain themselves within a given host.

1008

1009 If other organisms adapted to a gut environment did not have a strategy for  
1010 transmission across hosts, we would only see endospore-formers across people. Of  
1011 course, this is not the case, so how is it that these organisms transmit? There are a  
1012 number of possibilities, but persister states may allow non-endospore-forming  
1013 organisms to enter a metabolically inert state upon exit from the gastrointestinal tract.  
1014 Toxin-antitoxin systems, associated with persistence in *E. coli*, are overrepresented in  
1015 Bacteroidetes, Alpha- and Gammaproteobacteria<sup>61</sup>, and Bacteroidetes are among the  
1016 most metabolically inactive cells in human fecal samples<sup>62</sup>. However, we also observe  
1017 that among the non-Clostridia nOTUs, abundance is higher within hosts, suggesting that  
1018 simply by maintaining high population levels, these organisms increase their ability to  
1019 transmit to new hosts. When host populations are high density, gut residents do not  
1020 require long-term environmental survival; the probability of encountering a new host will  
1021 be high. However, when host populations are low density, long-term environmental  
1022 survival becomes a necessary strategy. Over longer evolutionary timescales,  
1023 endospore-formers should be selected for in hosts with low population densities.

1024

1025 Resistant cells appeared to be primed to enter uncolonized gastrointestinal tracts. There  
1026 may be a few reasons for this observation. Environmental resistance enables them to  
1027 survive for long periods of time without diminished viability. Specific molecular indicators  
1028 of a suitable host, such as bile acids, may permit germination and subsequent  
1029 outgrowth under the right host conditions. Outgrowth seems to require strict anaerobic  
1030 conditions and low reduction potentials as evidenced by the entrainment of rOTUs to  
1031 the dynamic behavior of the strictly anaerobic sulfite-reducer, *Bilophila*. Similarly, growth

1032 within the gastrointestinal tract permits sporulation for a number of these organisms as  
1033 well, giving them an exit strategy if host conditions are sub-optimal.

1034

1035 We demonstrate that even though resistant cells themselves appear to be lowly  
1036 abundant in human fecal material (on the order of 0.1-10% total biomass), sharing of  
1037 rOTUs and the Clostridia in particular is favored across unrelated individuals. The  
1038 increased sharing comes at the cost of vegetative cell abundance and persistence  
1039 within a host. Because of heterogeneity in the resistance phenotype even within strains  
1040 of the same species, few OTUs consistently form resistant cells at high levels across all  
1041 individuals in our dataset. This heterogeneity drives a signal where organisms forming  
1042 these resistant cells within any given person may not be doing so in other individuals,  
1043 yet when considering endospore-forming potential as a whole (i.e. through its  
1044 phylogenetic conservation within the Clostridia), OTUs with organisms that potentially  
1045 can form endospores are more likely than others to be found among many unrelated  
1046 individuals. Within a person, the organisms we observe forming resistant cells exhibit  
1047 distinct correlated behavior coupled to the dynamic behavior of select non-endospore-  
1048 forming taxa that likely respond to shared environmental signals.

1049

1050

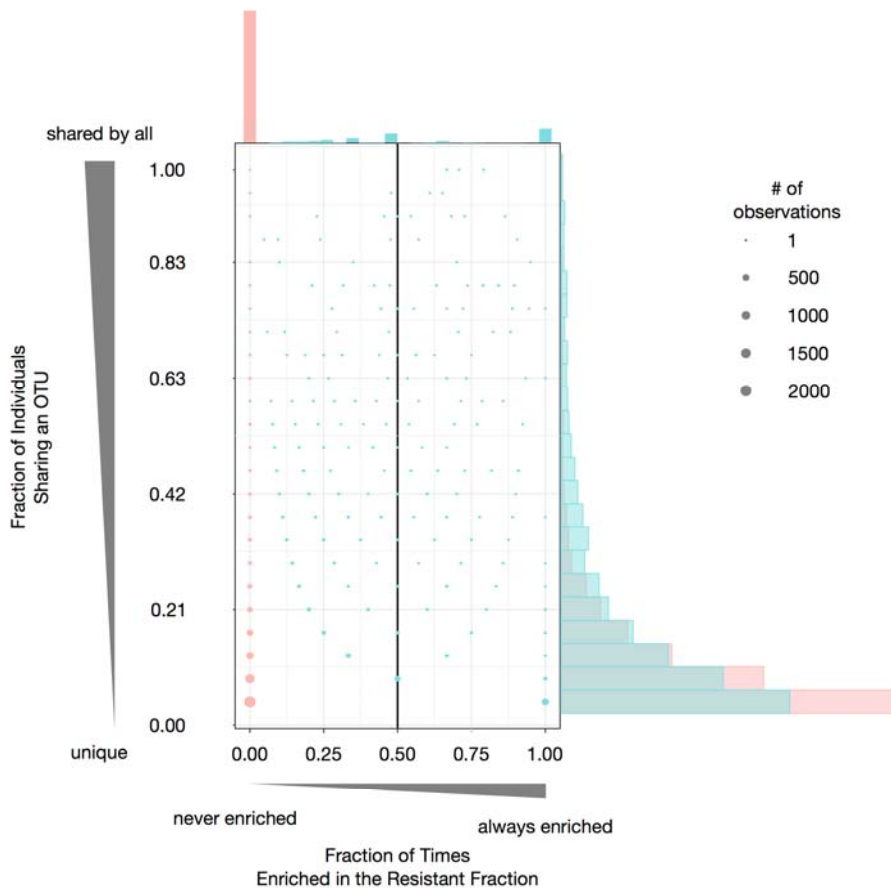

1051  
1052 **Supplementary Figure 1. Resistant OTUs are more prevalent across individuals in**  
1053 **their bulk communities.** The prevalence of OTUs across 24 individuals in our cohort  
1054 as a function of fraction of times the OTU was enriched in the resistant fraction relative  
1055 to the bulk community. The area of a point corresponds to the number of observations  
1056 of OTUs at a given fractional enrichment, fractional sharing pair. Pink points correspond  
1057 to nOTUs (never enriched in the endospore fraction) and blue points correspond to  
1058 rOTUs (those ever enriched in the endospore fraction). The histogram on top of the plot  
1059 relates the density of observations at each fractional enrichment level; the histogram on  
1060 the side of the plot relates the density of observations for nOTUs (pink) and rOTUs  
1061 (blue) across the sharing gradient.



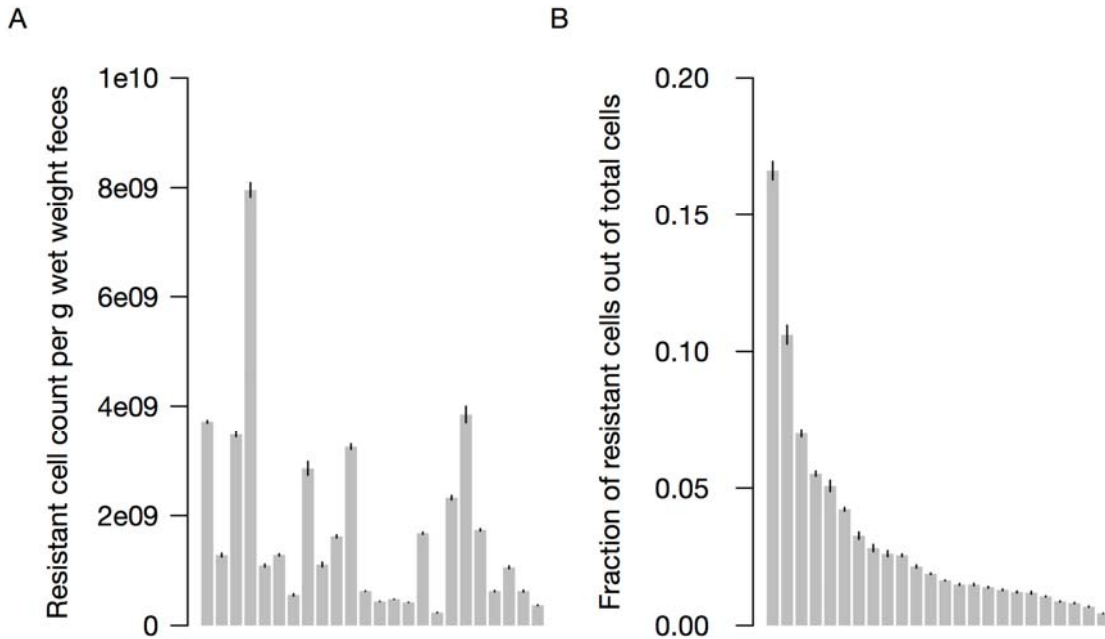

1063

1064 **Supplementary Figure 2. Resistant cells generally comprise fewer than 2% of**  
1065 **cells in the gut microbiota** (A) Resistant cell abundance sorted by fraction of total cells  
1066 estimated using qPCR on the resistant fraction quantified with a DNA standard curve of  
1067 a mock community consisting of cultured isolates of *E. coli*, *L. reuteri*, *V. parvula*, *B.*  
1068 *fragilis*, and *C. difficile*. (B) Endospore relative abundance as the fraction of total cells  
1069 estimated using qPCR, sorted from highest to lowest.

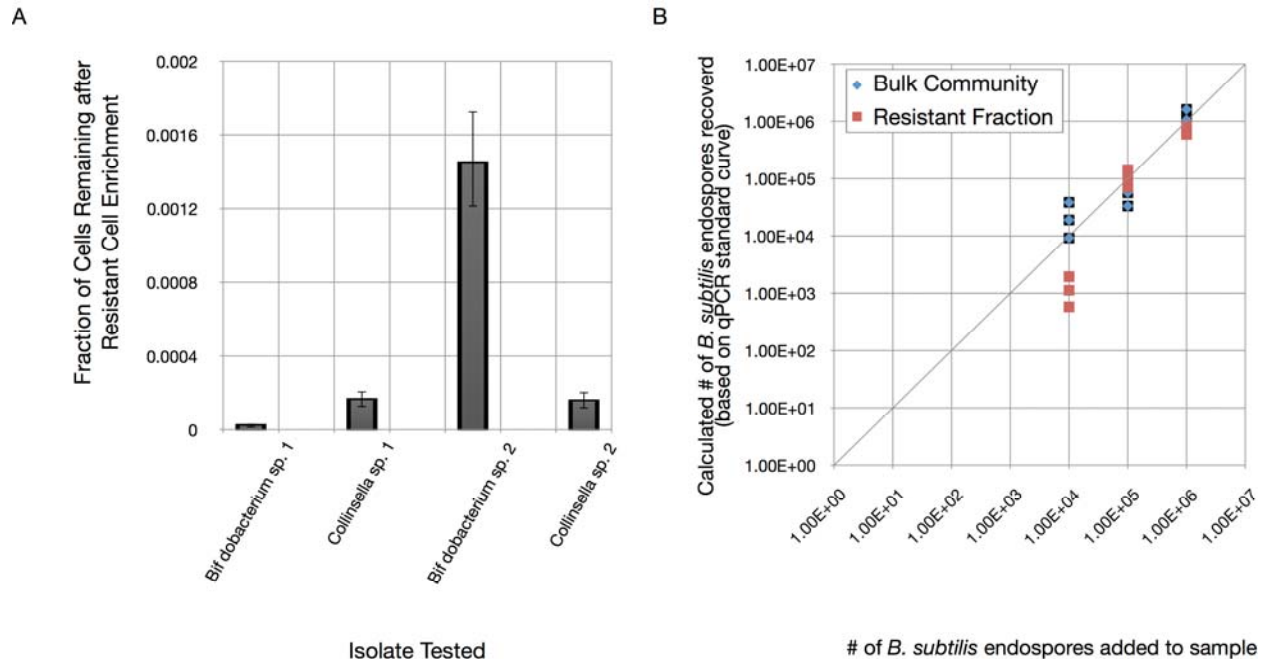

1070

Isolate Tested

# of *B. subtilis* endospores added to sample

1071 **Supplementary Figure 3. Cultured Actinobacteria isolated from the human gut are**

1072 **significantly depleted when enriching for resistant cells, but endospores are**

1073 **reliably recovered.** (A) Fraction of DNA remaining after resistant cell enrichment is

1074 applied to cultured Actinobacteria. Fractions are estimated by qPCR for four human gut-

1075 derived isolates from the phylum Actinobacteria calculated by comparing the threshold

1076 cycle (Ct) for amplification of DNA using the V4 16S rDNA primers used for library

1077 assembly. Ct is converted to DNA concentration using a standard curve of DNA

1078 dilutions for each isolate. Error bars are the standard error of the mean. (B) Estimate of

1079 the recovery of endospores of *B. subtilis* added at different amounts into independent

1080 fecal samples (individual points) and treated with standard DNA extraction (blue

1081 diamonds) or resistant fraction (red squares). Endospore recovery is estimated using

1082 qPCR with primers targeting *aprE* (*aprE* F: 5'-TTTACGATGGCGTTCAGCAAC-3', *aprE*

1083 R: 5'-GGAAGTGCCTTCATTTCCGGCT-3')<sup>63</sup>. The line  $y = x$  indicates stoichiometric

1084 recovery, and the horizontal dashed line shows the limit of detection of the primer set.



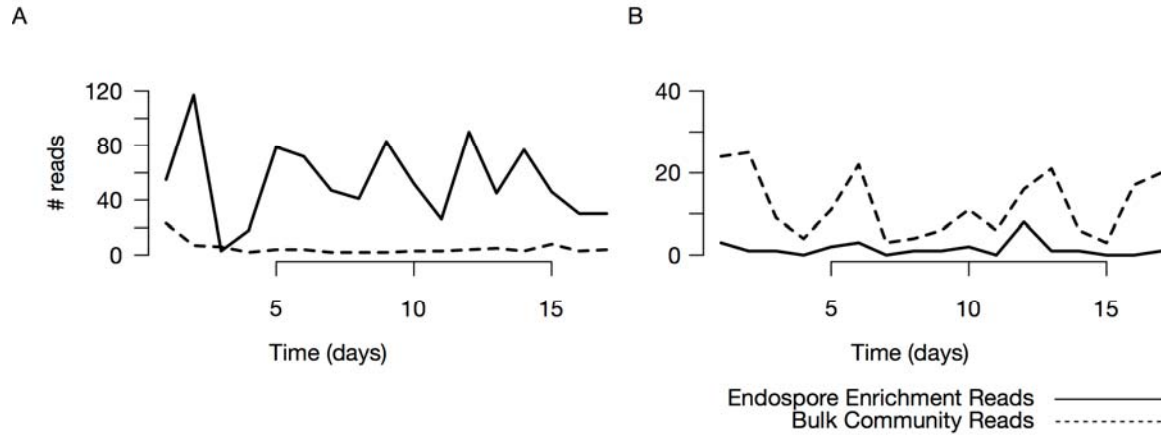

1085

1086 **Supplementary Figure 4. Time series of two distinct *Ruminococcus* OTUs show**

1087 **discordance in resistant fraction tendency. (A) Bulk community and resistant fraction**

1088 time series for a *Ruminococcus* OTU with corresponding V4 16S region matching at

1089 100% sequence identity to *Ruminococcus lactaris* ATCC 29176. (B) Bulk community

1090 and resistant fraction time series for a *Ruminococcus* OTU with corresponding V4 16S

1091 region matching at 97% sequence identity to *Ruminococcus faecis* strain Eg2.

1092

1093

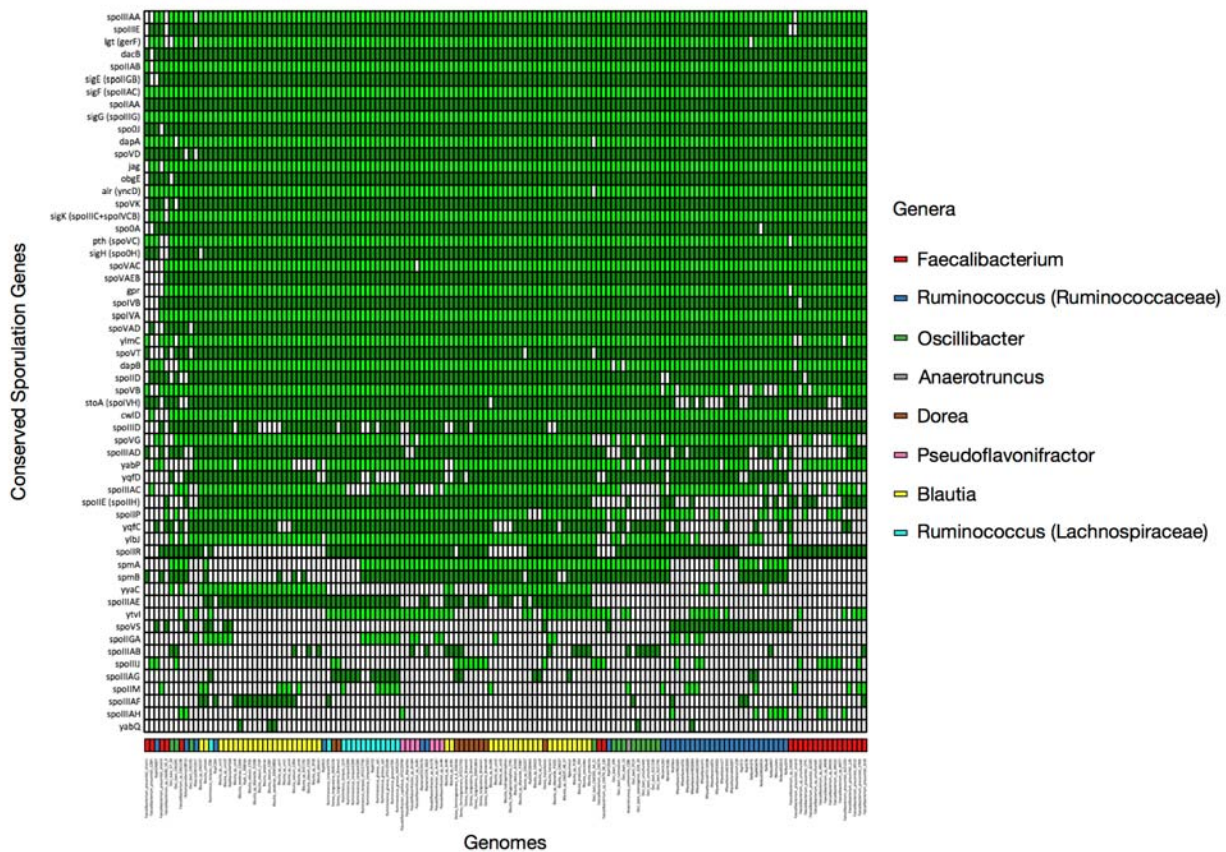

1094

1095 **Supplementary Figure 5. Variably endospore-enriched taxa lack several genes**  
1096 **shared between previously identified endospore-forming Bacilli and Clostridia.**

1097 Sporulation genes (y-axis) considered conserved between all endospore-forming *Bacilli*  
1098 and *Clostridia*<sup>31</sup> were mapped to genomes of genera (using tblastn with an E-value  
1099 cutoff of 1e-5) containing OTUs observed as significantly increased and decreased in  
1100 the resistant fraction across individuals measured by Mann Whitney U test (FDR  
1101 adjusted p-value < 0.10). Genomes on the x-axis are all genomes corresponding to the  
1102 named genera downloaded from the NCBI database as of August 2017. Color bar on  
1103 the x-axis corresponds to genera. Genomes are clustered using UPGMA hierarchical  
1104 clustering on presence-absence profiles of sporulation gene content; genes profiles

- 1105 across genomes are clustered using the same procedure. *Anaerotruncus colihomininis*
- 1106 (gray) is a known endospore-former that lacks several putatively conserved genes.

1107 **Supplementary Table 3. Significant (unadjusted  $p < 0.05$ ) Spearman Correlations**  
1108 **between metabolites and rOTU cluster.**

| <b>Metabolite Name</b> | <b>m/z</b> | <b>Spearman Rho</b> | <b>Unadjusted p-value</b> | <b>FDR q-value</b> |
|------------------------|------------|---------------------|---------------------------|--------------------|
| sebacate               | 201.1119   | 0.74                | 5.64E-05                  | 3.89E-03           |
| arachidonate           | 303.2321   | -0.593              | 2.72E-03                  | 3.13E-02           |
| docosapentaenoate      | 329.2476   | -0.582              | 3.39E-03                  | 3.13E-02           |
| eicosapentaenoate      | 301.2164   | -0.58               | 3.51E-03                  | 3.13E-02           |
| nonadecanoate          | 297.279    | -0.578              | 3.63E-03                  | 3.13E-02           |
| pentadecanoate         | 241.2162   | 0.591               | 2.81E-03                  | 3.13E-02           |
| 3-oxooctadecanoate     | 297.2427   | 0.619               | 1.58E-03                  | 3.13E-02           |
| docosahexaenoate       | 327.232    | -0.565              | 4.63E-03                  | 3.55E-02           |
| hydrocinnamate         | 149.0592   | 0.558               | 5.25E-03                  | 3.62E-02           |
| undecanedionate        | 215.1276   | 0.617               | 1.67E-03                  | 3.62E-02           |
| taurocholate           | 514.2825   | -0.549              | 6.23E-03                  | 3.91E-02           |
| crustecdysone          | 525.3053   | -0.608              | 2.37E-02                  | 1.09E-01           |
| adrenate               | 331.2633   | -0.474              | 2.04E-02                  | 1.09E-01           |
| 10-nonadecanoate       | 295.2633   | -0.473              | 2.07E-02                  | 1.09E-01           |
| dimethylurate          | 195.0511   | 0.469               | 2.23E-02                  | 1.09E-01           |
| eicosatrienoate        | 305.2477   | -0.438              | 3.33E-02                  | 1.44E-01           |
| arachidate             | 311.2947   | -0.424              | 3.99E-02                  | 1.62E-01           |
| urobilin               | 593.3324   | 0.417               | 4.35E-02                  | 1.67E-01           |

1109

1110

1111 **REFERENCES**

- 1112 1. Filippidou, S. *et al.* Under-detection of endospore-forming Firmicutes in  
1113 metagenomic data. *Comput. Struct. Biotechnol. J.* **13**, 299–306 (2015).
- 1114 2. Browne, H. P. *et al.* Culturing of ‘unculturable’ human microbiota reveals novel taxa  
1115 and extensive sporulation. *Nature* **533**, 543–546 (2016).
- 1116 3. Ley, R. E. *et al.* Evolution of Mammals and Their Gut Microbes. *Science* **320**, 1647–  
1117 1651 (2008).
- 1118 4. Angert, E. R. & Losick, R. M. Propagation by sporulation in the guinea pig symbiont  
1119 *Metabacterium polyspora*. *Proc. Natl. Acad. Sci.* **95**, 10218–10223 (1998).
- 1120 5. Flint, J. F., Drzymalski, D., Montgomery, W. L., Southam, G. & Angert, E. R.  
1121 Nocturnal Production of Endospores in Natural Populations of *Epulopiscium*-Like  
1122 Surgeonfish Symbionts. *J. Bacteriol.* **187**, 7460–7470 (2005).
- 1123 6. Alexander, C. J., Citron, D. M., Brazier, J. S. & Goldstein, E. J. Identification and  
1124 antimicrobial resistance patterns of clinical isolates of *Clostridium clostridioforme*,  
1125 *Clostridium innocuum*, and *Clostridium ramosum* compared with those of clinical  
1126 isolates of *Clostridium perfringens*. *J. Clin. Microbiol.* **33**, 3209–3215 (1995).
- 1127 7. Paredes-Sabja, D., Torres, J. A., Setlow, P. & Sarker, M. R. *Clostridium perfringens*  
1128 Spore Germination: Characterization of Germinants and Their Receptors. *J.*  
1129 *Bacteriol.* **190**, 1190–1201 (2008).
- 1130 8. Sokol, H. *et al.* *Faecalibacterium prausnitzii* is an anti-inflammatory commensal  
1131 bacterium identified by gut microbiota analysis of Crohn disease patients. *Proc. Natl.*  
1132 *Acad. Sci.* **105**, 16731–16736 (2008).

- 1133 9. Png, C. W. *et al.* Mucolytic bacteria with increased prevalence in IBD mucosa  
1134 augment in vitro utilization of mucin by other bacteria. *Am. J. Gastroenterol.* **105**,  
1135 2420–2428 (2010).
- 1136 10. Deakin, L. J. *et al.* The *Clostridium difficile spo0A* Gene Is a Persistence and  
1137 Transmission Factor. *Infect. Immun.* **80**, 2704–2711 (2012).
- 1138 11. Atarashi, K. *et al.* Induction of Colonic Regulatory T Cells by Indigenous Clostridium  
1139 Species. *Science* **331**, 337–341 (2011).
- 1140 12. Atarashi, K. *et al.* Treg induction by a rationally selected mixture of Clostridia strains  
1141 from the human microbiota. *Nature* **500**, 232–236 (2013).
- 1142 13. Stefka, A. T. *et al.* Commensal bacteria protect against food allergen sensitization.  
1143 *Proc. Natl. Acad. Sci.* **111**, 13145–13150 (2014).
- 1144 14. Kim, Y.-G. *et al.* Neonatal acquisition of *Clostridia* species protects  
1145 against colonization by bacterial pathogens. *Science* **356**, 315 (2017).
- 1146 15. Ivanov, I. I. *et al.* Induction of Intestinal Th17 Cells by Segmented Filamentous  
1147 Bacteria. *Cell* **139**, 485–498 (2009).
- 1148 16. Kuwahara, T. *et al.* The Lifestyle of the Segmented Filamentous Bacterium: A Non-  
1149 Culturable Gut-Associated Immunostimulating Microbe Inferred by Whole-Genome  
1150 Sequencing. *DNA Res.* **18**, 291–303 (2011).
- 1151 17. Sczesnak, A. *et al.* The Genome of Th17 Cell-Inducing Segmented Filamentous  
1152 Bacteria Reveals Extensive Auxotrophy and Adaptations to the Intestinal  
1153 Environment. *Cell Host Microbe* **10**, 260–272 (2011).
- 1154 18. Smith, P. M. *et al.* The Microbial Metabolites, Short-Chain Fatty Acids, Regulate  
1155 Colonic Treg Cell Homeostasis. *Science* **341**, 569–573 (2013).

- 1156 19. Furusawa, Y. *et al.* Commensal microbe-derived butyrate induces the differentiation  
1157 of colonic regulatory T cells. *Nature* **504**, 446–450 (2013).
- 1158 20. Van den Abbeele, P. *et al.* Butyrate-producing Clostridium cluster XIVa species  
1159 specifically colonize mucins in an in vitro gut model. *ISME J.* **7**, 949–961 (2013).
- 1160 21. Eeckhaut, V. *et al.* Butyrate production in phylogenetically diverse Firmicutes  
1161 isolated from the chicken caecum: Butyrate-producing bacteria from the chicken  
1162 caecum. *Microb. Biotechnol.* **4**, 503–512 (2011).
- 1163 22. Louis, P., Young, P., Holtrop, G. & Flint, H. J. Diversity of human colonic butyrate-  
1164 producing bacteria revealed by analysis of the butyryl-CoA:acetate CoA-transferase  
1165 gene. *Environ. Microbiol.* **12**, 304–314 (2010).
- 1166 23. Yano, J. M. *et al.* Indigenous Bacteria from the Gut Microbiota Regulate Host  
1167 Serotonin Biosynthesis. *Cell* **161**, 264–276 (2015).
- 1168 24. Kaplan, I. & Williams, J. W. Spore Formation among the Anaerobic Bacteria: I. The  
1169 Formation of Spores by Clostridium sporogenes in Nutrient Agar Media. *J. Bacteriol.*  
1170 **42**, 265 (1941).
- 1171 25. Dingman, D. W. & Stahly, D. P. Medium promoting sporulation of Bacillus larvae and  
1172 metabolism of medium components. *Appl. Environ. Microbiol.* **46**, 860–869 (1983).
- 1173 26. Wunderlin, T., Junier, T., Roussel-Delif, L., Jeanneret, N. & Junier, P. Endospore-  
1174 enriched sequencing approach reveals unprecedented diversity of *Firmicutes* in  
1175 sediments: Endospore-forming enrichment. *Environ. Microbiol. Rep.* **6**, 631–639  
1176 (2014).



- 1177 27. Sekar, R. *et al.* An Improved Protocol for Quantification of Freshwater Actinobacteria  
1178 by Fluorescence In Situ Hybridization. *Appl. Environ. Microbiol.* **69**, 2928–2935  
1179 (2003).
- 1180 28. Fahlgren, A., Hammarström, S., Danielsson, Å. & HAMMARSTRÖM, M.-L.  
1181 Increased expression of antimicrobial peptides and lysozyme in colonic epithelial  
1182 cells of patients with ulcerative colitis. *Clin. Exp. Immunol.* **131**, 90–101 (2003).
- 1183 29. Keshav, S., Chung, P., Milon, G. & Gordon, S. Lysozyme is an inducible marker of  
1184 macrophage activation in murine tissues as demonstrated by in situ hybridization. *J.*  
1185 *Exp. Med.* **174**, 1049 (1991).
- 1186 30. Gueimonde, M., Laitinen, K., Salminen, S. & Isolauri, E. Breast milk: a source of  
1187 bifidobacteria for infant gut development and maturation? *Neonatology* **92**, 64–66  
1188 (2007).
- 1189 31. Galperin, M. Y. *et al.* Genomic determinants of sporulation in *Bacilli* and *Clostridia*:  
1190 towards the minimal set of sporulation-specific genes: Distribution of sporulation  
1191 genes in *Bacilli* and *Clostridia*. *Environ. Microbiol.* **14**, 2870–2890 (2012).
- 1192 32. Popham, D. L., Illades-Aguiar, B. & Setlow, P. The *Bacillus subtilis* *dacB* gene,  
1193 encoding penicillin-binding protein 5\*, is part of a three-gene operon required for  
1194 proper spore cortex synthesis and spore core dehydration. *J. Bacteriol.* **177**, 4721–  
1195 4729 (1995).
- 1196 33. Orsburn, B., Sucre, K., Popham, D. L. & Melville, S. B. The SpmA/B and DacF  
1197 proteins of *Clostridium perfringens* play important roles in spore heat resistance.  
1198 *FEMS Microbiol. Lett.* **291**, 188–194 (2009).



- 1199 34. Serra, C. R., Earl, A. M., Barbosa, T. M., Kolter, R. & Henriques, A. O. Sporulation  
1200 during Growth in a Gut Isolate of *Bacillus subtilis*. *J. Bacteriol.* **196**, 4184–4196  
1201 (2014).
- 1202 35. Francis, M. B., Allen, C. A., Shrestha, R. & Sorg, J. A. Bile Acid Recognition by the  
1203 *Clostridium difficile* Germinant Receptor, CspC, Is Important for Establishing  
1204 Infection. *PLoS Pathog.* **9**, e1003356 (2013).
- 1205 36. Devkota, S. *et al.* Dietary-fat-induced taurocholic acid promotes pathobiont  
1206 expansion and colitis in *Il10<sup>-/-</sup>* mice. *Nature* (2012). doi:10.1038/nature11225
- 1207 37. Sorg, J. A. & Sonenshein, A. L. Inhibiting the Initiation of *Clostridium difficile* Spore  
1208 Germination using Analogs of Chenodeoxycholic Acid, a Bile Acid. *J. Bacteriol.* **192**,  
1209 4983–4990 (2010).
- 1210 38. Ceuppens, S. *et al.* Survival and Germination of *Bacillus cereus* Spores without  
1211 Outgrowth or Enterotoxin Production during In Vitro Simulation of Gastrointestinal  
1212 Transit. *Appl. Environ. Microbiol.* **78**, 7698–7705 (2012).
- 1213 39. Shah, I. M., Laaberki, M.-H., Popham, D. L. & Dworkin, J. A eukaryotic-like Ser/Thr  
1214 kinase signals bacteria to exit dormancy in response to peptidoglycan fragments.  
1215 *Cell* **135**, 486–496 (2008).
- 1216 40. Koenig, J. E. *et al.* Succession of microbial consortia in the developing infant gut  
1217 microbiome. *Proc. Natl. Acad. Sci.* **108**, 4578–4585 (2011).
- 1218 41. Chandan, R. C., Shahani, K. M. & Holly, R. G. Lysozyme Content of Human Milk.  
1219 *Nature* **204**, 76 (1964).

- 1220 42. Nayfach, S., Rodriguez-Mueller, B., Garud, N. & Pollard, K. S. An integrated  
1221 metagenomics pipeline for strain profiling reveals novel patterns of bacterial  
1222 transmission and biogeography. *Genome Res.* **26**, 1612–1625 (2016).
- 1223 43. Allegretti, J. R. *et al.* Recurrent *Clostridium difficile* infection associates with distinct  
1224 bile acid and microbiome profiles. *Aliment. Pharmacol. Ther.* **43**, 1142–1153 (2016).
- 1225 44. Youngster, I. *et al.* Fecal Microbiota Transplant for Relapsing *Clostridium difficile*  
1226 Infection Using a Frozen Inoculum From Unrelated Donors: A Randomized, Open-  
1227 Label, Controlled Pilot Study. *Clin. Infect. Dis.* **58**, 1515–1522 (2014).
- 1228 45. David, L. A. *et al.* Host lifestyle affects human microbiota on daily timescales.  
1229 *Genome Biol* **15**, R89 (2014).
- 1230 46. Bueche, M. *et al.* Quantification of Endospore-Forming Firmicutes by Quantitative  
1231 PCR with the Functional Gene *spo0A*. *Appl. Environ. Microbiol.* **79**, 5302–5312  
1232 (2013).
- 1233 47. Chomczynski, P. & Rymaszewski, M. Alkaline polyethylene glycol-based method for  
1234 direct PCR from bacteria, eukaryotic tissue samples, and whole blood.  
1235 *Biotechniques* **40**, 454 (2006).
- 1236 48. Preheim, S. P., Perrotta, A. R., Martin-Platero, A. M., Gupta, A. & Alm, E. J.  
1237 Distribution-Based Clustering: Using Ecology To Refine the Operational Taxonomic  
1238 Unit. *Appl. Environ. Microbiol.* **79**, 6593–6603 (2013).
- 1239 49. Fierer, N., Jackson, J. A., Vilgalys, R. & Jackson, R. B. Assessment of soil microbial  
1240 community structure by use of taxon-specific quantitative PCR assays. *Appl.*  
1241 *Environ. Microbiol.* **71**, 4117–4120 (2005).

- 1242 50. Zhang, J., Kobert, K., Flouri, T. & Stamatakis, A. PEAR: a fast and accurate Illumina  
1243 Paired-End reAd mergeR. *Bioinformatics* **30**, 614–620 (2014).
- 1244 51. Maidak, B. L. *et al.* The ribosomal database project (RDP). *Nucleic Acids Res.* **24**,  
1245 82–85 (1996).
- 1246 52. Wang, Q., Garrity, G. M., Tiedje, J. M. & Cole, J. R. Naive Bayesian classifier for  
1247 rapid assignment of rRNA sequences into the new bacterial taxonomy. *Appl.*  
1248 *Environ. Microbiol.* **73**, 5261–5267 (2007).
- 1249 53. Paulson, J. N., Stine, O. C., Bravo, H. C. & Pop, M. Differential abundance analysis  
1250 for microbial marker-gene surveys. *Nat. Methods* **10**, 1200–1202 (2013).
- 1251 54. Nicholson, W. & Setlow, P. Purification of spores on step gradients of Renografin. in  
1252 *Molecular Biological Methods for Bacillus* 391–450 (John Wiley, 1990).
- 1253 55. Fichtel, J., Köster, J., Rullkötter, J. & Sass, H. Spore dipicolinic acid contents used  
1254 for estimating the number of endospores in sediments: Determination of endospores  
1255 in sediments. *FEMS Microbiol. Ecol.* **61**, 522–532 (2007).
- 1256 56. Khanna, S. *et al.* A Novel Microbiome Therapeutic Increases Gut Microbial Diversity  
1257 and Prevents Recurrent *Clostridium difficile* Infection. *J. Infect. Dis.* **214**, 173–181  
1258 (2016).
- 1259 57. Lopez-Siles, M. *et al.* Cultured Representatives of Two Major Phylogroups of Human  
1260 Colonic Faecalibacterium prausnitzii Can Utilize Pectin, Uronic Acids, and Host-  
1261 Derived Substrates for Growth. *Appl. Environ. Microbiol.* **78**, 420–428 (2012).
- 1262 58. Lopetuso, L. R., Scaldaferri, F., Petito, V. & Gasbarrini, A. Commensal Clostridia:  
1263 leading players in the maintenance of gut homeostasis. *Gut Pathog.* **5**, 1 (2013).

- 1264 59. Smedman, A. E., Gustafsson, I.-B., Berglund, L. G. & Vessby, B. O. Pentadecanoic  
1265 acid in serum as a marker for intake of milk fat: relations between intake of milk fat  
1266 and metabolic risk factors. *Am. J. Clin. Nutr.* **69**, 22–29 (1999).
- 1267 60. Hayashi, A. *et al.* A Single Strain of *Clostridium butyricum* Induces Intestinal IL-10-  
1268 Producing Macrophages to Suppress Acute Experimental Colitis in Mice. *Cell Host*  
1269 *Microbe* **13**, 711–722 (2013).
- 1270 61. Makarova, K. S., Wolf, Y. I. & Koonin, E. V. Comprehensive comparative-genomic  
1271 analysis of Type 2 toxin-antitoxin systems and related mobile stress response  
1272 systems in prokaryotes. *Biol. Direct* **4**, 19 (2009).
- 1273 62. Maurice, C. F., Haiser, H. J. & Turnbaugh, P. J. Xenobiotics Shape the Physiology  
1274 and Gene Expression of the Active Human Gut Microbiome. *Cell* **152**, 39–50 (2013).
- 1275 63. Sadeghi, A., Mortazavi, S. A., Bahrami, A. R. & Sadeghi, B. Design of multiplex PCR  
1276 for simultaneous detection of rope - forming *Bacillus* strains in Iranian bread dough.  
1277 *J. Sci. Food Agric.* **92**, 2652–2656 (2012).
- 1278
